## RESEARCH ARTICLE

# Role of TLR4 signaling on *Porphyromonas gingivalis* LPS-induced cardiac dysfunction in mice

**Running title:** Oxidative stress in the heart of periodontitis

Ichiro Matsuo<sup>1,2</sup>, Naoya Kawamura<sup>1,2</sup>, Yoshiki Ohnuki<sup>1</sup>, Kenji Suita<sup>1</sup>, Misao

Ishikawa<sup>3</sup>, Takehiro Matsubara<sup>4</sup>, Yasumasa Mototani<sup>1</sup>, Aiko Ito<sup>5</sup>, Yoshio Hayakawa

<sup>1,6</sup>, Megumi Nariyama<sup>7</sup>, Akinaka Morii<sup>1,2</sup>, Kenichi Kiyomoto<sup>1,2</sup>, Michinori Tsunoda<sup>1,2</sup>,

Kazuhiro Gomi<sup>2</sup>, Satoshi Okumura<sup>1</sup>

<sup>1</sup>Department of Physiology, Tsurumi University School of Dental Medicine, Yokohama 230-8501, Japan

<sup>2</sup>Department of Periodontology, Tsurumi University School of Dental Medicine, Yokohama 230-8501, Japan

<sup>3</sup>Department of Oral Anatomy, Tsurumi University School of Dental Medicine, Yokohama 230-8501, Japan

<sup>4</sup> Division of BioBank, Center for Comprehensive Genomic Medicine, Okayama University Hospital, Okayama, Japan

<sup>5</sup> Department of Orthodontics, Tsurumi University School of Dental Medicine, Yokohama 230-8501, Japan

<sup>6</sup> Department of Dental Anesthesiology, Tsurumi University School of Dental Medicine, Yokohama 230-8501, Japan

<sup>7</sup> Department of Pediatric Dentistry, Tsurumi University School of Dental Medicine, Yokohama 236-8501, Japan

\*Corresponding author: Satoshi Okumura:

Department of Physiology, Tsurumi University School of Dental Medicine,

2-1-3 Tsurumi, Tsurumi-ku, Yokohama 230-8501; (Tel. +81-(0)45-580-8476;

Fax. +81-(0)45-585-2889; e-mail: [okumura-s@tsurumi-u.ac.jp](mailto:okumura-s@tsurumi-u.ac.jp))

**Word count: 9,487**

**7 figures, 2 tables and 21 supplementary figures**

## Abstract

Oral infections, particularly periodontitis, are a well-established risk factor for cardiovascular diseases, although the molecular mechanisms involved remain elusive. The aims of the present study were to investigate the effects of lipopolysaccharide derived from *Porphyromonas gingivalis* (PG-LPS) on cardiac function in mice, and to elucidate the underlying mechanisms. Mice (C57BL/6) were injected with PG-LPS (0.8 mg/kg/day) with or without an inhibitor of Toll-like receptor 4 (TLR4) signaling (TAK-242, 0.8 mg/kg/day) for 4 weeks. Left ventricular ejection function was significantly decreased at 1 week (from  $67 \pm 0.5$  to  $58 \pm 1.2$  %) and remained low at 4 weeks ( $57 \pm 1.0$  %). The number of apoptotic myocytes was increased (approximately 7.4-fold), the area of fibrosis was increased (approximately 3.3-fold) and the number of 8-hydroxydeoxyguanosine-positive myocytes, a sensitive indicator of oxidative DNA damage, was increased (approximately 7.6-fold) at 4 weeks in the heart of PG-LPS treated mice. However, levels of various serum pro-inflammatory cytokines in PG-LPS-treated mice were similar to those in control mice. The impairment of cardiac function in PG-LPS-treated mice appears to involve activation of TLR4-NADPH oxidase (NOX) 4 signaling, leading to abundant production of reactive oxygen species

and Ca<sup>2+</sup> leakage from sarcoplasmic reticulum induced by calmodulin kinase II (CaMKII)-mediated phosphorylation of phospholamban (at Thr-17) and ryanodine receptor 2 (at Ser-2448). Pharmacological inhibition of TLR4 with TAK-242 attenuated the changes in cardiac function in PG-LPS-treated mice. Our results indicate that TLR4-NOX4 signaling may be a new therapeutic target for treatment of cardiovascular diseases in patients with periodontitis.

## Introduction

Periodontitis (PD) is a bacterial infection in the tissue that supports the teeth, leading to chronic local inflammation, destruction of connective tissue and alveolar bone, and eventually loss of teeth. It is also associated with an increased incidence of cardiovascular disease (CVD) in humans [1]. *Porphyromonas gingivalis* (PG) is a gram-negative bacterial pathogen often identified in adult PD, and systemic exposure to pro-inflammatory factors from PG, including lipopolysaccharide, may contribute to CVD [1]. Lipopolysaccharide (LPS), a cell wall component of gram-negative bacteria, plays a major role in the inflammatory response following bacterial infection [2], as well as in the myocardial depression seen in adult patients with sepsis or severe gram-negative bacterial infection [3]. But, even though PG-LPS is widely accepted as a contributor to PD-induced systemic inflammation, and high anti-PG antibody levels were reported to be a risk factor for future CVD events in a cohort of middle-aged subjects [4], little is known about the precise relationship between PG-LPS and cardiac dysfunction.

Although PG-LPS and *Escherichia coli* LPS are both derived from gram-negative bacteria, they differ in structure and function. The two types of LPS differentially

modulate expression of Toll-like receptor (TLR) 2, TLR4, and cell surface receptor and differentiation marker (CD) 14 , as well as primary and secondary cytokine responses [5]. *Escherichia coli* LPS targets TLR4 and activates the NF- $\kappa$ B signaling pathway, leading to the secretion of inflammatory cytokines, such as tumor necrosis factor  $\alpha$  (TNF- $\alpha$ ) and interleukin 6 (IL-6), and chemokines, such as monocyte chemoattractant protein-1 (MCP-1) [6]. The receptor of PG-LPS was initially reported to be TLR2, in contrast with the well-established role of TLR4 as the receptor for *Escherichia coli* LPS [7]. However, this proved controversial, because synthetic PG lipid A activates TLR4 but not TLR2 [8, 9]. More recently, PG-LPS was shown to mediate pro-inflammatory signaling exclusively through TLR4, while activation of the TLR2-dependent pathway was related to be the presence of contaminants in the LPS preparation [6].

Persistently elevated LPS levels are found in chronic diseases, including PD, and thus cardiac cells expressing TLR4 may be a target for PG-LPS [10]. Activation of the innate immune system in the heart by TLR4 has diverse effects, which may be cardioprotective in the short-term, whereas sustained activation may be maladaptive [11]. More importantly, to our knowledge there has been no study of the myocardial

effects of persistent subclinical exposure to PG-LPS, even though subclinical endotoxemia results in a 3-fold-increased risk of atherosclerosis and CVD [12].

Therefore, the aims of this study were to evaluate cardiac dysfunction in mice treated with PG-LPS at a dose equivalent to the circulating levels in PD patients to examine the effects of a TLR4 antagonist (6R)-6-[N-(2-chloro-4-fluorophenyl)sulfamoyl] cyclohex-1-ene-1-carboxylate (TAK-242) [13, 14] on the changes of cardiac function, and to clarify the mechanisms involved.

## Materials and methods

### Mice and experimental protocols

All experiments were performed on male 12-week-old C57BL/6 mice obtained from CLEA Japan (Tokyo, Japan). Mice were group-housed at 23°C under a 12-12 light/dark cycle with lights on at 8:00 AM in accordance with standard conditions for mouse studies by our group [15-18]. Both food and water were available ad libitum.

PG-LPS (Wako, Osaka, Japan) was dissolved in saline to prepare a 0.6 mg/ml stock solution [13] and TAK-242 (ChemScene, Monmouth Junction, NJ, USA) was formulated with 1 % dimethyl sulfate and double-distilled water to prepare a 0.4 mg/ml stock solution. The appropriate volumes of these solutions to provide the desired dose (PG-LPS: 0.8 mg/kg and/or TAK-242: 3 mg/kg) was added to 0.2 ml of saline to prepare the solution for intraperitoneal (i.p.) injection (once daily for 4 weeks); control mice received an identical volume of saline only [19] (**Fig 1A**). In addition, BW and intake of food and water were monitored for all mice throughout the 4-week experimental period. The dose of PG-LPS used in this study is consistent with the circulating levels in PD patients, indicating that this model is not a sepsis model, and no mortality was observed [13]. After the completion of treatment, mice were anesthetized



with isoflurane. The heart, lungs and liver were excised, weighed, frozen in liquid nitrogen, and stored at -80°C. The organ mass (mg) and the ratio of organ mass to tibia length (TL; mm) were used as indexes of organ volume. After tissue extraction, the mice were anesthetized via a mask with isoflurane (1.0-1.5% v/v) and killed by cervical dislocation [20].

### **Ethical approval**

All animal experiments complied with the ARRIVE guidelines [21] and were carried out in accordance with the National Institutes of Health guide for the care and use of laboratory animals [22] and institutional guidelines. The experimental protocol was approved by the Animal Care and Use Committee of Tsurumi University (No. 29A041).

### **Physiological experiments**

Mice were anesthetized with isoflurane vapor (1.0-1.5% v/v) titrated to maintain the lightest anesthesia possible and echocardiographic measurements were performed

by using ultrasonography (TUS-A300, Toshiba, Tokyo, Japan) as described previously [23].

### **Evaluation of fibrosis**

Among several quantitative methods available to determine interstitial fibrotic regions [16, 24, 25], we employed Masson-trichrome staining using the Accustatin Trichrome Stain Kit (#HT15-1KT; Sigma-Aldrich, St. Louis, MO) in accordance with the manufacturer's protocol, as described previously. We quantified interstitial fibrotic regions using freely available image analysis software (Image J 1.45; <https://imagej.nih.gov/ij/download.html>) to evaluate the percentage of blue area in the Masson-trichrome sections [16].

### **Evaluation of apoptosis**

Apoptosis was determined by TUNEL staining using an Apoptosis *in situ* Detection Kit (#293-71501; Wako, Osaka, Japan). TUNEL-positive nuclei per field of view were manually counted in six sections of each of the four groups (Control, PG-LPS, TAK-242, PG-LPS + TAK-242) over a microscopic field of 20 x, averaged

and expressed as the ratio of TUNEL-positive nuclei (%) [23, 26]. Limiting the counting of total nuclei and TUNEL-positive nuclei to areas with true cross sections of myocytes made it possible to selectively count only those nuclei that were clearly located within myocytes.

### **Bio-Plex measurement of pro-inflammatory cytokines, PDGF-BB and VEGF**

Serum levels of pro-inflammatory cytokines IL-6, IL-1 $\beta$ , IL-10, IL-17, IFN- $\gamma$ , MCP-1 and TNF- $\alpha$ , as well as biomarkers of endothelial function, PDGF-BB and VEGF, were measured using a multiplex suspension array (Bio-Plex, Bio-Rad, Hercules, CA, USA) [27].

### **Western blotting**

The cardiac muscle excised from the mice (**Fig 1A**) was homogenized in a Polytron (Kinematica AG, Lucerne, Switzerland) in ice-cold RIPA buffer (Thermo Fisher Scientific, Waltham, MA, USA: 25 mM Tris-HCl (pH 7.6), 150mM NaCl, 1 % NP-40, 1 % sodium deoxycholate, 0.1 % SDS) without addition of inhibitors [28], and the homogenate was centrifuged at 13,000 x g for 10 min at 4°C. The supernatant was collected and the protein concentration was measured using a DC protein assay kit (Bio-Rad, Hercules, CA, USA). Equal amounts of protein (5  $\mu$ g) were subjected to

12.5 % SDS-polyacrylamide gel electrophoresis and blotted onto 0.2 mm PVDF

membrane (Millipore, Billerica, MA, USA).

Western blotting was conducted with commercially available antibodies [23, 26, 29]. The primary antibodies against TLR4 (1:1000, #14358),  $\alpha$ -SMA (1:1000, 19245), Akt (1:1000, #9272), phospho-Akt (Ser-473, 1:1000, #9721), CaMKII (1:1000, #3362), phospho-CaMKII (1:1000, Thr-286, #3361), ERK (1:1000, #4695), phospho-ERK (1:2000, Thr-202/Tyr-204, #4370), BCL-2 (1:1000, #3498), LC3 (1:1000, #12741) and phospho- mTOR (1:1000, Ser-2448, #5536), mTOR (1:1000, #2972), p70S6K (1:1000, #9202), phospho-p70S6K (1:1000, Thr-389), RIP3 (1:1000, #95702), phospho-RIP3 (1:1000, Thr231/Ser232, #91702), AMPK (1:1000, #2532) and phospho-AMPK (1:1000, Thr-172, #2535) were purchased from Cell Signaling Technology (Boston, MA, USA), anti-ox-CaMKII was purchased from Millipore (1:1000, #07-1387, Billerica, MA, USA), the primary antibodies against glyceraldehyde-3-phosphate dehydrogenase (GAPDH) (1:200, sc-25778) were purchased from Santa Cruz Biotechnology (Santa Cruz, CA, USA) and the primary antibodies against phospho-PLN (1:5000, Thr-17, #A010-13), PLN (1:5000, #A010-14), phospho- RyR2 (1:2000, Ser-2808, #A010-30) and phospho-RyR2 (Ser-2814, #A010-31) were

purchased from Badrilla (Leeds, UK), while RyR2 (1:1000, #MA3-916) was purchased from Thermo Fisher (Rockland, IL, USA). The primary antibodies against p62 (1:1000, #PM045) and phospho-p62 (1:500, Ser-351) (#PM074MS) were purchased from MBL (Nagoya, Japan) and the primary antibodies against NOX4, 1:1000, #ab133303) and NOX2 (1:1000, #ab80508) were purchased from Abcam (Cambridge, UK). Horseradish peroxidase-conjugated anti-rabbit (1:5000, #NA934) or anti-mouse IgG (1:5000, #NA931) purchased from GB Healthcare was used as a secondary antibody. The primary and secondary antibodies were diluted in Tris-buffered saline (pH 7.6) with 0.1 % Tween 20 and 5 % bovine serum albumin. The blots were visualized with enhanced chemiluminescence solution (ECL:Prime Western Blotting Detection Reagent, GE Healthcare, Piscataway, NJ, USA) and scanned with a densitometer (LAS-1000, Fuji Photo Film, Tokyo, Japan).

### **Immunostaining**

Oxidative DNA damage in the myocardium was evaluated by immunostaining for 8-OHdG using the Vector M.O.M Immunodetection system (#PK-2200, Vector Laboratories, Inc. Burlingame, CA, USA) [17, 18, 30, 31]. Cross sections were cut with

a cryostat at -20°C at 10 µm, air-dried and fixed with 4% paraformaldehyde (v/v) in TBS-T for 5 min at room temperature. Antigen retrieval was achieved with 0.1% citrate plus 1% Triton X-100 for 30 min at room temperature, then the sections were washed with TBS-T, incubated with 0.3% horse serum in TBS-T for 1 h at room temperature, and blocked with M.O.M. blocking reagents (Vector Laboratories, Burlingame, CA, USA) overnight at 4°C. For the positive control, sections were incubated with 0.3% H<sub>2</sub>O<sub>2</sub> in TBS-T before the anti-8-OHdG antibody treatment. The sections were incubated with anti-8-OHdG antibody (8.3 µg/ml in M.O.M. Dilute; clone N45.1 monoclonal antibody; Japan Institute for the Control of Aging, Shizuoka, Japan) overnight at 4°C in a humidified chamber, and then incubated with 0.3% H<sub>2</sub>O<sub>2</sub> in 0.3% horse serum for 1 h at room temperature to inactivate endogenous peroxidase, rinsed with TBS-T, incubated with anti-mouse IgG in M.O.M. Diluent, and processed with an ABC kit (Vector Laboratories, Inc. Burlingame, CA, USA). We calculated the ratio of 8-OHdG nuclei with oxidative DNA damage (stained dark brown) per total cell numbers.

### **Statistical analysis**

Data show means  $\pm$  standard deviation (SD). Comparison of data was performed using one-way ANOVA followed by Tukey's *post hoc* test. Differences were considered significant when  $P < 0.05$ .

## Results

### Body weight, daily consumption of food and water

The Control, PG-LPS, TAK-242, PG-LPS + TAK-242 groups all showed similar body weight (BW) at 4 weeks after the PG-LPS infusion (PG-LPS [ $n = 7$ ]:  $27.4 \pm 0.6$ , TAK-242 [ $n = 7$ ]:  $27.2 \pm 0.7$ , PG-LPS + TAK-242 [ $n = 7$ ]:  $26.7 \pm 0.4$  g, all not significantly different [NS;  $P > 0.05$ ] vs. Control [ $n = 7$ ;  $25.8 \pm 0.4$  g]) (**Fig 1B**), and the consumed amounts of both food (**Fig 1C**) and water (**Fig 1D**) were also similar among the four groups (food: PG-LPS [ $n = 7$ ]:  $3.6 \pm 0.1$ , TAK [ $n = 7$ ]:  $3.4 \pm 0.1$ , PG-LPS + TAK-242 [ $n = 7$ ]:  $3.6 \pm 0.1$  g, all NS [ $P > 0.05$ ] vs. Control [ $3.6 \pm 0.1$  g]; water: PG-LPS [ $n = 6$ ]:  $6.4 \pm 0.2$ , TAK-242 [ $n = 7$ ]:  $6.5 \pm 0.1$ , PG-LPS + TAK-242 [ $n = 7$ ]:  $6.5 \pm 0.2$  ml/day, all NS [ $P > 0.05$ ] vs. Control [ $n = 6$ ;  $6.4 \pm 0.2$  ml/day] each).

Thus, chronic PG-LPS treatment with or without TAK-242 under the experimental conditions used in this study did not appear to affect growth, or food and water consumption.

### Effects of PG-LPS on heart, lung and liver weight



Mice in the four groups were sacrificed at 4 weeks, and the cardiac muscle (CA) was weighed to evaluate cardiac hypertrophy, and the lungs and liver were weighed to estimate the pulmonary and liver congestion.

Heart weight in terms of the ratio of CA weight per tibia length (TL) was not significantly different among the four groups (CA/TL: PG-LPS [ $n = 7$ ]:  $7.5 \pm 0.3$ , TAK [ $n = 7$ ]:  $7.2 \pm 0.5$ , PG-LPS + TAK-242 [ $n = 7$ ]:  $7.7 \pm 0.3$ , all NS [ $P > 0.05$ ] vs. Control [ $n = 7$ ;  $7.5 \pm 0.4$  g] each) (**S1 Fig of S1 Data**). The lung weight in terms of the ratio of lung weight per TL (**S1B Fig of S1 Data**), and liver weight in terms of the ratio of liver weight per TL (**S1C Fig of S1 Data**) were also similar among the four groups (lung weight/TL: PG-LPS [ $n = 7$ ]:  $8.9 \pm 0.4$ , TAK [ $n = 7$ ]:  $9.2 \pm 0.3$ , PG-LPS + TAK-242 [ $n = 7$ ]:  $9.0 \pm 0.2$  mg/mm, all NS [ $P > 0.05$ ] vs. Control [ $n = 7$ ;  $8.6 \pm 0.3$  mg/mm]; liver weight/TL: PG-LPS [ $n = 7$ ]:  $85.1 \pm 3.1$ , TAK [ $n = 7$ ]:  $73.1 \pm 2.9$ , PG-LPS + TAK-242 [ $n = 7$ ]:  $73.2 \pm 3.6$  mg/mm, all NS [ $P > 0.05$ ] vs. Control [ $n = 7$ ;  $80.3 \pm 2.9$  mg/mm]).

Thus, neither PG-LPS nor TAK-242 at the dose used in this experiment appeared to influence the weight of the heart, liver or lungs during the 4-week experimental period.

### **Serum levels of pro-inflammatory cytokines, PDGF-BB and VEGF**

We examined the effects of chronic PG-LPS infusion on serum levels of IL-6, IL-1 $\beta$ , IL-10, IL-17, interferon- $\gamma$  (IFN- $\gamma$ ), MCP-1, TNF- $\alpha$ , as well as platelet-derived growth factor-BB (PDGF-BB) and vascular endothelial growth factor (VEGF). The serum levels of these molecules were similar among the four groups (**Table 1**), indicating that chronic PG-LPS infusion had no effect on them.

### **Changes of cardiac function during the chronic PG-LPS infusion**

Echocardiography was performed at 1 week (**Table 2A**) and 4 weeks (**Table 2B**) after the start of chronic PG-LPS treatment with or without TAK-242.

Cardiac function in terms of left ventricular ejection fraction (EF) and %fractional shortening (FS) was significantly decreased at 1 week after chronic PG-LPS injection (EF: Control [ $n = 7$ ] vs. PG-LPS [ $n = 7$ ]:  $67 \pm 0.5$  vs.  $58 \pm 1.2$  %,  $P < 0.01$ ; FS: Control [ $n = 7$ ] vs. PG-LPS [ $n = 7$ ]:  $32 \pm 0.3$  vs.  $26 \pm 0.7$  %,  $P < 0.01$ ) with an increase of left ventricular internal dimension at end-systole (LVIDs: Control [ $n = 7$ ] vs. PG-LPS [ $n = 7$ ]:  $2.9 \pm 0.07$  vs.  $3.3 \pm 0.06$ ,  $P < 0.01$ ). Cardiac function remained depressed at 4 weeks after chronic PG-LPS injection (EF: Control [ $n = 7$ ] vs. PG-LPS [ $n = 7$ ]:  $66 \pm 0.5$  vs.  $57 \pm 0.1$  %,  $P < 0.01$ ; FS: Control [ $n = 7$ ] vs. PG-LPS [ $n = 7$ ]:  $32 \pm 0.3$  vs.  $26 \pm 0.7$  %,  $P <$

0.01). Importantly, PG-LPS-mediated cardiac dysfunction was attenuated by pharmacological inhibition of TLR4 with TAK-242 at 4 weeks (EF: PG-LPS [ $n = 7$ ] vs. PG-LPS + TAK-242 [ $n = 7$ ]:  $57 \pm 1.0$  vs.  $61 \pm 0.6$  %,  $P < 0.05$ ; FS: PG-LPS [ $n = 7$ ] vs. PG-LPS + TAK-242 [ $n = 7$ ]:  $26 \pm 0.7$  vs.  $28 \pm 0.4$  %,  $P < 0.05$ ).

These data indicate that chronic PG-LPS infusion at a physiologically realistic dose level induces cardiac dysfunction through the activation of TLR4.

### **Effects of PG-LPS on the cardiac fibrosis**

We next examined cardiac remodeling, which we evaluated in terms of fibrosis and myocyte apoptosis, because it might lead to progressive heart failure [23, 26].

We first evaluated fibrosis by means of Masson-trichrome staining (**Fig 2A-B**). Chronic PG-LPS infusion significantly increased the area of fibrosis, compared to the control (Control [ $n = 7$ ] vs. PG-LPS [ $n = 7$ ]:  $0.9 \pm 0.2$  vs.  $2.9 \pm 0.4$ %,  $P < 0.01$ ). This PG-LPS-mediated increase of cardiac fibrosis was significantly attenuated by TAK-242 (PG-LPS [ $n = 7$ ] vs. PG-LPS + TAK-242 [ $n = 7$ ]:  $2.9 \pm 0.4$  vs.  $1.1 \pm 0.1$  %,  $P < 0.01$ ).

We also evaluated cardiac fibrosis by measuring the levels of p44/42MAPK (ERK) phosphorylation (**Fig 2C**) and  $\alpha$ -smooth muscle actin ( $\alpha$ -SMA) expression (**Fig 2D**) at 4

weeks after the start of PG-LPS, because they are closely associated with cardiac fibrosis [16, 32]. Expression levels of phospho-ERK (Thr-202/Tyr-204) and  $\alpha$ -SMA were significantly increased in cardiac muscle of PG-LPS-treated mice (ERK: Control [ $n = 5$ ] vs. PG-LPS [ $n = 5$ ]:  $100 \pm 8.8$  vs.  $170 \pm 13$  %,  $P < 0.05$ ;  $\alpha$ -SMA: Control [ $n = 4$ ] vs. PG-LPS [ $n = 4$ ]:  $100 \pm 13$  vs.  $167 \pm 24$  %,  $P < 0.05$ ), and these increases were significantly attenuated by TAK-242 (ERK: PG-LPS [ $n = 5$ ] vs. PG-LPS + TAK-242 [ $n = 6$ ]:  $170 \pm 13$  vs.  $108 \pm 5.9$  %,  $P < 0.05$ ;  $\alpha$ -SMA: Control [ $n = 4$ ] vs. PG-LPS [ $n = 4$ ]:  $167 \pm 24$  vs.  $59 \pm 10$  %,  $P < 0.01$ ).

These data suggest that cardiac fibrosis induced by chronic PG-LPS infusion might be mediated, at least in part, through the activation of TLR4.

### **Effects of PG-LPS on myocyte apoptosis**

We next evaluated cardiac myocyte apoptosis by means of terminal deoxyribonucleotidyl transferase (TdT)-mediated biotin-16-deoxyuridine triphosphate (dUTP) nick-end labeling (TUNEL) staining at 4 weeks after the start of PG-LPS (**Fig 3A-B**). Chronic PG-LPS infusion increased myocyte apoptosis, compared to the control (Control [ $n = 7$ ] vs. PG-LPS [ $n = 7$ ]:  $0.9 \pm 0.1$  vs.  $6.6 \pm 1.3$  %,  $P < 0.01$ ). This

PG-LPS-mediated increase of cardiac myocyte apoptosis was attenuated by TAK-242

(PG-LPS [ $n = 7$ ] vs. PG-LPS + TAK-242 [ $n = 7$ ]:  $6.6 \pm 1.3$  vs.  $2.0 \pm 0.5$  %,  $P < 0.01$ ).

We also evaluated cardiac myocyte apoptosis by measuring the change of anti-apoptotic BCL-2 protein in the heart (**Fig 3C**). B cell lymphoma 2 (BCL-2) expression was significantly decreased in cardiac muscle of PG-LPS-treated mice (Control [ $n = 5$ ] vs. PG-LPS [ $n = 5$ ]:  $100 \pm 6.2$  vs.  $75 \pm 2.9$  %,  $P < 0.05$ ) and the increase was significantly attenuated by TAK-242 (PG-LPS [ $n = 5$ ] vs. PG-LPS + TAK-242 [ $n = 5$ ]:  $75 \pm 2.9$  vs.  $108 \pm 4.0$  %,  $P < 0.01$ ).

These data suggest that the induction of cardiac myocyte apoptosis induced by chronic PG-LPS infusion might be mediated, at least in part, through the activation of TLR4.

### **Oxidative stress was increased by chronic PG-LPS infusion**

TLR4 signaling activates various downstream signal transduction pathways, including oxidative stress, by increasing the generation of reactive oxygen species (ROS) [33].

We thus examined in-situ expression of 8-hydroxy-2'-deoxyguanosine (8-OHdG), a DNA modification product generated by ROS, as a marker for oxidative DNA damage in the four groups (**Figs 4A-B**). We examined the validity of the 8-OHdG immunostaining used in this study by incubation in TBS-T with (positive control) or without (negative control) 0.3% H<sub>2</sub>O<sub>2</sub> at room temperature for 1 h prior to anti-8-OHdG antibody treatment. The results demonstrate that the 8-OHdG staining procedure clearly distinguished 8-OHdG-positive from non-positive nuclei (**S2 Fig of S1 Data**).

The number of 8-OHdG-positive cardiac myocytes was significantly increased at 4 weeks after PG-LPS treatment (Control [*n* = 7] vs. PG-LPS [*n* = 7]: 2.5 ± 0.3 vs. 19.0 ± 1.4 %, *P* < 0.01), but this increase was significantly attenuated by TAK-242 (PG-LPS [*n* = 7] vs. PG-LPS + TAK-242 [*n* = 7]: 19.0 ± 1.4 vs. 9.2 ± 0.5 %, *P* < 0.01) (**Fig 4B**).

These data suggest that oxidative stress might also play an important role, at least in part, in the development of PG-LPS-mediated cardiac dysfunction via TLR4.

### **NOX4 expression was increased by chronic PG-LPS infusion**

Nicotinamide adenine dinucleotide phosphate oxidase-4 (NOX4) is the only known enzymes, whose physiological function is to produce ROS in cardiac myocytes [34].

NOX2 and NOX4 are abundantly expressed in cardiac myocytes, and their activity is controlled by their expression level [33]. We thus examined NOX2 and NOX4 expression in the heart in the four groups.

TLR4 expression was similar among the four groups (**Fig 4C**). However, NOX4 expression was significantly increased (Control [ $n = 5$ ] vs. PG-LPS [ $n = 5$ ]:  $100 \pm 18$  vs.  $169 \pm 19$  %,  $P < 0.05$ ). This increase was significantly attenuated by TAK-242 (PG-LPS [ $n = 5$ ] vs. PG-LPS + TAK-242 [ $n = 5$ ]:  $169 \pm 19$  vs.  $92 \pm 10$  %,  $P < 0.01$ ) (**Fig 4D**). In contrast, NOX2 expression was similar among the four groups (**Fig 4E**). .

These data suggest that chronic PG-LPS infusion increased the generation of ROS via activation of the TLR4-NOX4 pathway.

### **Necroptosis was increased by chronic PG-LPS infusion**

ROS derived from NOX4 was recently demonstrated to cause apoptosis and necroptosis via activation of receptor-interacting protein 3 (RIP3), a key determinant of programmed necrosis (necroptosis), in endothelial cells [35]. We thus examined the amount of phospho-RIP3 (Thr-231/Ser-232) and found that it was significantly increased in the heart of PG-LPS-treated mice (Control [ $n = 5$ ] vs. PG-LPS [ $n = 4$ ]: 100

$\pm 6.8$  vs.  $177 \pm 15$  %,  $P < 0.05$ ). Again, this increase was significantly attenuated by TAK-242 (PG-LPS [ $n = 4$ ] vs. PG-LPS + TAK-242 [ $n = 5$ ]:  $177 \pm 15$  vs.  $86 \pm 21$  %,  $P < 0.01$ ,  $n = 5$ ) (**Fig 5A**).

These data suggest that chronic PG-LPS infusion might increase RIP3 phosphorylation, leading to apoptosis and necroptosis, via ROS production derived from TLR4-NOX4 signaling in cardiac muscle.

### **Phosphorylation and oxidation of CaMKII was increased by chronic PG-LPS infusion**

Calmodulin kinase II (CaMKII) was recently demonstrated to be one of the targets of RIP3, which activates CaMKII via phosphorylation and oxidation [36]. We thus examined the amounts of phospho-CaMKII (Thr-286) (**Fig 5B**) and oxidized methionine-281/282 CaMKII (ox-CaMKII) (**Fig 5C**) in the heart of PG-LPS-treated mice and found that they were significantly increased at 4 weeks after the PG-LPS treatment (CaMKII (Thr-286): Control [ $n = 6$ ] vs. PG-LPS [ $n = 5$ ]:  $100 \pm 12.1$  vs.  $213 \pm 25$  %,  $P < 0.05$ ; ox-CaMKII: Control [ $n = 4$ ] vs. PG-LPS [ $n = 4$ ]:  $100 \pm 20$  vs.  $412 \pm 72$  %,  $P < 0.01$ ). These changes were significantly attenuated by TAK-242 (CaMKII



[Thr-286]: PG-LPS [ $n = 5$ ] vs. PG-LPS + TAK-242 [ $n = 4$ ]:  $213 \pm 25$  vs.  $103 \pm 31$  %,  $P < 0.05$ ; ox-CaMKII: PG-LPS [ $n = 4$ ] vs, PG-LPS + TAK-242 [ $n = 4$ ]:  $412 \pm 72$  vs.  $186 \pm 19$  %,  $P < 0.05$ ).

These data suggest that chronic PG-LPS infusion might activate TLR4/RIP3/CaMKII signaling in cardiac myocytes.

### **Phosphorylation of PLN and RyR2 was increased by chronic PG-LPS infusion**

ROS derived from NOX4 was recently demonstrated to induce Ca<sup>2+</sup>-mishandling via altered phosphorylation of phospholamban (PLN) on Thr-17 and ryanodine receptor 2 (RyR2) on Ser-2814, mediated by CaMKII as well as ox-CaMKII, leading to cardiac remodeling and dysfunction [37]. We thus examined the effects of chronic PG-LPS on phosphorylation of PLN, focusing on Thr-17, which is phosphorylated by CaMKII (**Fig 5D**).

Phospho-PLN (Thr-17) was significantly increased in cardiac muscle of PG-LPS-treated mice (Control [ $n = 7$ ] vs. PG-LPS [ $n = 7$ ]:  $100 \pm 34$  vs.  $824 \pm 279$  %,  $P < 0.05$  vs. Control) (**Fig 5D**) and this increase was significantly attenuated by TAK-242 (PG-LPS [ $n = 7$ ] vs. PG-LPS + TAK-242 [ $n = 4$ ]:  $824 \pm 279$  vs.  $320 \pm 123$  %,  $P < 0.05$ ).

Like PLN, phospho-RyR2 (Ser-2814), which is phosphorylated by CaMKII, was also significantly increased in cardiac muscle of PG-LPS- treated mice (Control [ $n = 7$ ] vs. PG-LPS [ $n = 6$ ]:  $100 \pm 9.6$  vs.  $161 \pm 14.2$  %,  $P < 0.05$  vs. Control) (**Fig 5E**) and this increase was significantly attenuated by TAK-242 (PG-LPS [ $n = 6$ ] vs. PG-LPS + TAK-242 [ $n = 6$ ]:  $161 \pm 14.2$  vs.  $107 \pm 15$  %,  $P < 0.05$ ).

These data suggest that chronic PG-LPS infusion might increase phosphorylation of PLN and RyR2 via TLR4-NOX4 signaling, leading to  $\text{Ca}^{2+}$ -mishandling in cardiac myocytes.

### **Akt-mTOR-p70S6K signaling was activated by chronic PG-LPS infusion**

NOX4 activation was recently demonstrated to cause cardiac remodeling through activation of Akt- mechanistic target of rapamycin (mTOR)-p70 ribosomal S6 kinase (p70S6K) signaling [38].

Phospho-Akt (Ser-473) was significantly increased in the heart of PG-LPS-treated mice at 4 weeks (Control [ $n = 6$ ] vs. PG-LPS [ $n = 6$ ]:  $100 \pm 5.6$  vs.  $132 \pm 3.1$  %,  $P < 0.01$ ), and this increase was significantly attenuated by TAK-242 (PG-LPS [ $n = 6$ ] vs. PG-LPS + TAK-242 [ $n = 5$ ]:  $132 \pm 3.1$  vs.  $105 \pm 3.1$  %,  $P < 0.01$ ) (**Fig 6A**).

Phospho-mTOR (Ser-2448) and phospho-p70S6K (Thr-389) were similarly significantly increased in the heart of PG-LPS-treated mice at 4 weeks (mTOR: Control [ $n = 4$ ] vs. PG-LPS [ $n = 4$ ]:  $100 \pm 17.3$  vs.  $264 \pm 58.4$  %,  $P < 0.05$ ; p70S6K: Control [ $n = 5$ ] vs. PG-LPS [ $n = 5$ ]:  $100 \pm 4.7$  vs.  $160 \pm 11$  %,  $P < 0.01$ ). These increases were significantly attenuated by TAK-242 (mTOR: PG-LPS [ $n = 4$ ] vs. PG-LPS + TAK-242 [ $n = 5$ ]:  $264 \pm 58.4$  vs.  $164 \pm 28.3$  %,  $P < 0.05$ ; p70S6K: PG-LPS [ $n = 5$ ] vs. PG-LPS + TAK-242 [ $n = 5$ ]:  $160 \pm 11$  vs.  $119 \pm 8.4$  %,  $P < 0.01$ ) (**Figs 6B-C**).

These data suggest that chronic PG-LPS infusion might increase the activation of Akt-mTOR-p70S6K signaling, thereby contributing to cardiac remodeling and cardiac dysfunction.

### **Autophagic activity was increased by chronic PG-LPS infusion**

We next investigated the effects of PG-LPS on autophagy in the cardiac muscle (**Fig 7A**), because TLR4-NOX4 signaling is known to promote cell death through autophagy in rats with heart failure induced by aortic banding [39].

The amount of microtubule-associated protein 1 light chain 3 (LC3)-II was measured in terms of LC3-II/LC3-I, which correlates with the number of

autophagosomes and provides a good index of autophagy induction [40]. LC3-II/LC3-I was significantly increased in the heart of PG-LPS-treated mice for 4 weeks (Control [ $n = 7$ ] vs. PG-LPS [ $n = 7$ ]:  $100 \pm 11.7$  vs.  $254 \pm 49$  %,  $P < 0.01$ ). This increase was significantly attenuated by TAK-242 (PG-LPS [ $n = 7$ ] vs. PG-LPS + TAK-242 [ $n = 6$ ]:  $254 \pm 49$  vs.  $123 \pm 15$  %,  $P < 0.05$ ) (**Fig 7B**). We also examined LC3-II expression and found that it was significantly increased in the heart of PG-LPS-treated mice at 4 weeks (Control [ $n = 7$ ] vs. PG-LPS [ $n = 7$ ]:  $100 \pm 12$  vs.  $240 \pm 29$  %,  $P < 0.01$ ). The increase was significantly attenuated by TAK-242 (PG-LPS [ $n = 7$ ] vs. PG-LPS + TAK-242 [ $n = 4$ ]:  $240 \pm 29$  vs.  $73 \pm 7$  %,  $P < 0.01$ ) (**Fig 7C**).

Increased LC-3-II could reflect either increased autophagosome formation due to autophagy induction, or a blockage in the downstream steps from autophagy, such as insufficient fusion or decreased autophagosome degradation [41]. Increased p62 phosphorylation on serine 351 is known to be necessary for autophagic degradation of polyubiquitinated proteins and for recruiting autophagy machinery proteins [42]. Furthermore, mTOR phosphorylation (Ser-2448) was recently demonstrated to increase the phosphorylation of serine 351 of p62 [43]. We thus examined the level of p62 expression as well as phosphorylation on serine 351, and found that p62

phosphorylation was significantly increased in the PG-LPS group (Control [ $n = 4$ ] vs. PG-LPS [ $n = 6$ ]:  $100 \pm 11$  vs.  $154 \pm 11$  %,  $P < 0.01$ ). This increase was suppressed by TAK-242 (PG-LPS [ $n = 6$ ] vs. PG-LPS + TAK-242 [ $n = 6$ ]:  $154 \pm 11$  vs.  $106 \pm 5$ ,  $P < 0.01$  vs. PG-LPS) (**Fig 7D**). However, p62 expression was similar among all four groups (**Fig 7E**).

These data suggest that chronic PG-LPS treatment might increase autophagic activity via TLR4 activation, leading to an increase of autophagosome number as well as autophagy flux.

### **AMPK signaling was activated by chronic PG-LPS infusion**

Cardiac excitation-contraction coupling is impaired by enhancing sarcoplasmic reticulum  $\text{Ca}^{2+}$  leakage through TLR4-ROS signaling via CaMKII phosphorylation and oxidization [44]. AMP-activated protein kinase (AMPK), which might lie downstream of CaMKII and can be phosphorylated on Thr-172 in response to an increased intracellular  $\text{Ca}^{2+}$  level, was recently demonstrated to regulate a variety of metabolic processes including autophagy [45, 46]. We thus examined the effects of chronic PG-LPS activation on phosphorylation of AMPK.

Phospho-AMPK (Thr-172) was significantly increased in cardiac muscle of PG-LPS-treated mice at 4 weeks (Control [ $n = 5$ ] vs. PG-LPS [ $n = 5$ ]:  $100 \pm 19$  vs.  $243 \pm 45$  %,  $P < 0.05$ ) and this increase was significantly attenuated by TAK-242 (PG-LPS [ $n = 5$ ] vs. PG-LPS + TAK-242 [ $n = 5$ ]:  $243 \pm 45$  vs.  $79 \pm 17$  %,  $P < 0.01$ ) (**Fig 7F**).

These data suggest that chronic PG-LPS treatment might increase autophagic activity through activation of CaMKII-AMPK signaling via TLR4.

## Discussion

Our findings here indicate that cardiac function was significantly impaired in mice treated with PG-LPS at a dose consistent with circulating levels in PD patients, and myocyte apoptosis, fibrosis and oxidative stress were significantly increased. Importantly, these changes were blunted by pharmacological inhibition of TLR4 with TAK-242. We then investigated the mechanism of these changes.

The pro-inflammatory effect of PG-LPS on macrophages is controversial. Martin et al. reported that 1 ng/ml *E. Coli* LPS and 10.000 ng/ml PG-LPS induced similar levels of IL-6 and TNF- $\alpha$  in a human macrophage cell line, THP-1 cells [47], and another group also found that PG-LPS is a less potent inducer of pro-inflammatory cytokines than *E. Coli* LPS [48]. On the other hand, Jones et al reported that PG-LPS induced a strong pro-inflammatory cytokine response, particularly for IL-1 $\beta$ , IL-6, and MCP-1, in a mouse alveolar macrophage cell line AMJ2-C8, compared to the *E.coli* LPS [5]. Therefore, we examined the effects of chronic PG-LPS infusion on serum levels of IL-6, IL-1 $\beta$ , IL-10, IL-17, IFN- $\gamma$ , MCP-1 and TNF- $\alpha$ , in addition to endothelial biomarkers PDGF-BB and VEGF, in order to exclude the possibility that the cardiac dysfunction observed here might be simply a consequence of inflammation

caused by chronic PG-LPS infusion [49, 50]. However, we found no significant differences among the four groups in this study.

VEGF and PDGF can cause endothelial dysfunction, which might induce matrix remodeling and cardiac dysfunction [51]. However, in the present model, the serum levels of VEGF and PDGF-BB were similar among the four groups, suggesting that PG-LPS does not induce endothelial dysfunction at the dose used in this study.

We thus focused on the TLR4 and its downstream signaling to clarify the mechanism of PG-LPS-mediated cardiac dysfunction, and hypothesized that ROS production and oxidative stress, via activation of the TLR4-NOX4 pathway, might play a key role.

NOX2 and NOX4 are the predominant isoforms expressed in cardiac myocytes [52]. These enzymes exhibit high sequence homology, but have distinct characteristics. NOX2 is localized primarily in the plasma membrane, and its activation contributes to cardiac hypertrophy, fibrosis and heart failure via increased oxidative stress [53]. NOX4 is found in intracellular membranes, such as mitochondria, endoplasmic reticulum, nuclear and sarcoplasmic reticulum membranes [54]. NOX4 is constitutively active and is regulated primarily at the level of its expression [54]. In this study, we found that



NOX4 expression was significantly increased in the heart of PG-LPS-treated mice.

Notably, this increase of NOX4 expression was effectively alleviated by pharmacological inhibition of TLR4 with TAK-242. These results suggest that PG-LPS activates TLR4-NOX4 signaling in the heart.

Little is known regarding the isoform-specific role of NOX in the development of PG-LPS-mediated cardiac remodeling. Emerging data are conflicting, with considerable debate as to whether NOX4 is protective [55] or deleterious [38] for the development of cardiac remodeling. In this study, the impairment of cardiac function in PG-LPS-treated mice was associated with activation of the TLR4-NOX4 pathway, because cardiac fibrosis, cardiac myocyte apoptosis, oxidative stress and autophagy were all significantly increased in the heart of PG-LPS-treated mice, and these changes were attenuated by the TLR4 receptor antagonist TAK-242.

We found that CaMKII-mediated PLN phosphorylation (Thr-17) and RyR2 phosphorylation (Ser-2448) were significantly increased in the heart of PG-LPS-treated mice, and TAK-242 ameliorated these changes. It has been reported that NOX4 in the sarcoplasmic reticulum regulates RyR1 phosphorylation and intracellular Ca<sup>2+</sup> leakage in skeletal muscle [56]. Our data, together with the previous findings, suggest that local

ROS production derived from NOX4 in the sarcoplasmic reticulum might be associated with the increased PLN and RyR2 phosphorylation via activation of CaMKII.

It has been reported that ROS derived from NOX4 in the mitochondrial membrane might cause mitochondrial dysfunction and cardiac myocyte apoptosis during aging and heart failure [57]. In this study, we found that cardiac myocyte apoptosis was significantly increased in the heart of PG-LPS-treated mice and this increase was attenuated by TAK-242. Our current findings, together with the previous studies, suggested that local ROS production via NOX4 in the mitochondrial membrane might be involved, at least in part, in the induction of cardiac apoptosis by chronic PG-LPS infusion.

The TLR4-NOX4 pathway was demonstrated to cause cardiac fibrosis and hypertrophy by enhancing Akt-mTOR signaling [38]. mTOR has been found at various locations, including lysosomes, nuclei, mitochondria and plasma membrane [58]. Although it remains unclear which localization of NOX4 within cardiac myocytes might be involved in activating the Akt-mTOR-p70S6K pathway, we confirmed that Akt-mTOR-p70S6K signaling was activated in the heart of PG-LPS-treated mice, and this might contribute to cardiac remodeling.

Activation of the TLR4-NOX4 pathway is closely related to autophagy, and ROS generated via NOX4 within the endoplasmic reticulum plays an important role in this process [54]. Activation of TLR4-NOX4 pathway was also reported to promote cell death through autophagy during the progression of heart failure [39]. We thus examined the autophagic activity in terms of the LC3-II/LC3-I, which correlate with the number of autophagosomes [40], and p62 phosphorylation on serine 351, an indicator of autophagy flux [42]. Both the LC3-II/LC3-I ratio and the level of p62 phosphorylation on serine 351 were increased in the heart of PG-LPS-treated mice at 4 weeks, and these increases were blocked by TAK-242. These findings, together with the previous studies, suggest that increased autophagic activity due to activation of the TLR4-NOX pathway might contribute to PG-LPS-mediated cardiac remodeling.

## **Conclusion**

This study provides the first evidence that activation of TLR4-NOX4 signaling contributes to the development of cardiac remodeling and cardiac dysfunction induced by chronic PG-LPS infusion in mice. Consequently, pharmacological inhibition of the TLR4-NOX4 pathway might be a promising strategy to decrease ROS production in patients with periodontitis.

## **Author contributions**

**Conceptualization:** Ichiro Matsuo, Naoya Kawamura, Yoshiki Ohnuki, Kenji Suita, Satoshi Okumura.

**Formal analysis:** Ichiro Matsuo, Naoya Kawamura, Kenji Suita, Takehiro Matsubara, Satoshi Okumura.

**Funding acquisition:** Ichiro Matsuo, Naoya Kawamura, Yoshiki Ohnuki, Kenji Suita, Aiko Ito, Megumi Nariyama, Satoshi Okumura.

**Investigation:** Ichiro Matsuo, Naoya Kawamura, Kenji Suita, Takehiro Matsubara, Aiko Ito, Yoshio Hayakawa, Akinaka Morii, Kenichi Kiyomoto, Michinori Tsunoda.

**Methodology:** Ichiro Matsuo, Naoya Kawamura, Yoshiki Ohnuki, Kenji Suita, Misao Ishikawa, Takehiro Matsubara, Yasumasa Mototani.

**Supervision:** Kazuhiro Gomi, Satoshi Okumura.

**Writing-original draft:** Satoshi Okumura.

## References

1. Beck JD, Pankow J, Tyroler HA, Offenbacher S. Dental infections and atherosclerosis. *Am Heart J.* 1999;138(5 Pt 2):S528-S533.  
[https://doi.org/10.1016/s0002-8703\(99\)70293-0](https://doi.org/10.1016/s0002-8703(99)70293-0). PMID: 10539866.
2. Ulevitch RJ, Tobias PS. Recognition of gram-negative bacteria and endotoxin by the innate immune system. *Curr Opin Immunol.* 1999;11(1):19-22.  
[https://doi.org/10.1016/s0952-7915\(99\)80004-1](https://doi.org/10.1016/s0952-7915(99)80004-1). PMID: 10047547.
3. Peng T, Lu X, Lei M, Moe GW, Feng Q. Inhibition of p38 MAPK decreases myocardial TNF-alpha expression and improves myocardial function and survival in endotoxemia. *Cardiovasc Res.* 2003;59(4):893-900.  
[https://doi.org/10.1016/s0008-6363\(03\)00509-1](https://doi.org/10.1016/s0008-6363(03)00509-1) PMID: 14553829.
4. Pussinen PJ, Tuomisto K, Jousilahti P, Havulinna AS, Sundvall J, Salomaa V. Endotoxemia, immune response to periodontal pathogens, and systemic inflammation associate with incident cardiovascular disease events. *Arterioscler Thromb Vasc Biol.* 2007;27(6):1433-1439. [https://doi: 10.1161/atvbaha.106.138743](https://doi.org/10.1161/atvbaha.106.138743). PMID: 17363692.
5. Jones KJ, Ekhlassi S, Montufar-Solis D, Klein JR, Schaefer JS. Differential cytokine patterns in mouse macrophages and gingival fibroblasts after stimulation with

- porphyromonas gingivalis or Escherichia coli lipopolysaccharide. J Periodontol. 2010;81(12):1850-1857. [https://doi: 10.1902/jop.2010.100226](https://doi.org/10.1902/jop.2010.100226). PMID: 20843233.
6. Nativel B, Couret D, Giraud P, Meilhac O, d'Hellencourt CL, Viranaicken W, et al. Porphyromonas gingivalis lipopolysaccharides act exclusively through TLR4 with a resilience between mouse and human. Sci Rep. 2017;7(1):15789. [https://doi: 10.1038/s41598-017-16190-y](https://doi.org/10.1038/s41598-017-16190-y). PMID: 29150625.
7. Darveau RP, Pham TT, Lemley K, Reife RA, Bainbridge BW, Coats SR, et al. Porphyromonas gingivalis lipopolysaccharide contains multiple lipid A species that functionally interact with both toll-like receptors 2 and 4. Infect Immun. 2004;72(9):5041-5051. [https://doi: 10.1128/iai.72.9.5041-5051.2004](https://doi.org/10.1128/iai.72.9.5041-5051.2004). PMID: 15321997.
8. Sawada N, Ogawa T, Asai Y, Makimura Y, Sugiyama A. Toll-like receptor 4-dependent recognition of structurally different forms of chemically synthesized lipid A of Porphyromonas gingivalis. Clin Exp Immunol. 2007;148(3):529-536. [https://doi: 10.1111/j.1365-2249.2007.03346.x](https://doi.org/10.1111/j.1365-2249.2007.03346.x). PMID: 17335558.
9. Ogawa T, Asai Y, Makimura Y, Tamai R. Chemical structure and immunobiological activity of Porphyromonas gingivalis lipid A. Front Biosci. 2007;12:3795-3812. [https://doi:10.2741/2353](https://doi.org/10.2741/2353). PMID: 17485340.

10. Frantz S, Kobzik L, Kim YD, Fukazawa R, Medzhitov R, Lee RT, et al. Toll4 (TLR4) expression in cardiac myocytes in normal and failing myocardium. *J Clin Invest.* 1999;104(3):271-280. [https://doi: 10.1172/jci6709](https://doi.org/10.1172/jci6709). PMID: 10430608.
11. Mann DL. The emerging role of innate immunity in the heart and vascular system: for whom the cell tolls. *Circ Res.* 2011;108(9):1133-45. [https://doi: 10.1161/circresaha.110.226936](https://doi.org/10.1161/circresaha.110.226936). PMID: 21527743.
12. Wiedermann CJ, Kiechl S, Dunzendorfer S, Schratzberger P, Egger G, Oberhollenzer F, et al. Association of endotoxemia with carotid atherosclerosis and cardiovascular disease: prospective results from the Bruneck Study. *J Am Coll Cardiol.* 1999;34(7):1975-1981. [https://doi:10.1016/s0735-1097\(99\)00448-9](https://doi.org/10.1016/s0735-1097(99)00448-9). PMID: 10588212.
13. Deleon-Pennell KY, de Castro Bras LE, Lindsey ML. Circulating *Porphyromonas gingivalis* lipopolysaccharide resets cardiac homeostasis in mice through a matrix metalloproteinase-9-dependent mechanism. *Physiol Rep.* 2013;1(5):e00079. [https://doi: 10.1002/phy2.79](https://doi.org/10.1002/phy2.79). PMID: 24159380.
14. Xiong XY, Liu L, Wang FX, Yang YR, Hao JW, Wang PF, et al. Toll-Like receptor 4/MyD88-mediated signaling of hepcidin expression causing brain iron accumulation, oxidative injury, and cognitive impairment after intracerebral hemorrhage.



Circulation. 2016;134(14):1025-38. [https://doi: 10.1161/circulationaha.116.021881](https://doi.org/10.1161/circulationaha.116.021881).

PMID: 27576776.

15. Kawamura N, Ohnuki Y, Matsuo I, Suita K, Ishikawa M, Mototani Y, et al.

Effects of chronic *Porphyromonas gingivalis* lipopolysaccharide infusion on skeletal

muscles in mice. *J Physiol Sci*. 2019;69(3):503-511. [https://doi:](https://doi.org/10.1007/s12576-019-00670-z)

[10.1007/s12576-019-00670-z](https://doi.org/10.1007/s12576-019-00670-z). PMID: 30848475.

16. Ito A, Ohnuki Y, Suita K, Ishikawa M, Mototani Y, Shiozawa K, et al. Role of

$\beta$ -adrenergic signaling in masseter muscle. *PLoS One*. 2019;14(4):e0215539.

[https://doi: 10.1371/journal.pone.0215539](https://doi.org/10.1371/journal.pone.0215539). PMID: 30986276.

17. Suita K, Yagisawa Y, Ohnuki Y, Umeki D, Nariyama M, Ito A, et al. Effects of

occlusal disharmony on susceptibility to atrial fibrillation in mice. *Scientific reports*.

2020;10(1):13765. [https://doi: 10.1038/s41598-020-70791-8](https://doi.org/10.1038/s41598-020-70791-8). PMID: 32792672.

18. Yagisawa Y, Suita K, Ohnuki Y, Ishikawa M, Mototani Y, Ito A, et al. Effects

of occlusal disharmony on cardiac fibrosis, myocyte apoptosis and myocyte oxidative

DNA damage in mice. *PLoS One*. 2020;15(7):e0236547. [https://doi:](https://doi.org/10.1371/journal.pone.0236547)

[10.1371/journal.pone.0236547](https://doi.org/10.1371/journal.pone.0236547). PMID: 32716920.

19. Moser VA, Uchoa MF, Pike CJ. TLR4 inhibitor TAK-242 attenuates the adverse neural effects of diet-induced obesity. 2018;15(1):306. [https://doi: 10.1186/s12974-018-1340-0](https://doi.org/10.1186/s12974-018-1340-0). PMID: 30396359.
20. Goodman CA, Frey JW, Mabrey DM, Jacobs BL, Lincoln HC, You JS, et al. The role of skeletal muscle mTOR in the regulation of mechanical load-induced growth. J Physiol. 2011;589 (Pt 22):5485-5501. [https://doi: 10.1113/jphysiol.2011.218255](https://doi.org/10.1113/jphysiol.2011.218255). PMID: 21946849.
21. Kilkenny C, Parsons N, Kadyszewski E, Festing MF, Cuthill IC, Fry D, et al. Survey of the quality of experimental design, statistical analysis and reporting of research using animals. PLoS One. 2009;4(11):e7824. [https://doi: 10.1371/journal.pone.0007824](https://doi.org/10.1371/journal.pone.0007824). PMID: 19956596.
22. National Research Council (US) Committee for the Update of the Guide for the Care and Use of Laboratory Animals. 18 th edition, Washington (DC): National Academies Press (US) 2011. <https://doi.org/10.17226/12910>. PMID: 21595115.
23. Okumura S, Fujita T, Cai W, Jin M, Namekata I, Mototani Y, et al. *Epac1*-dependent phospholamban phosphorylation mediates the cardiac response to

stresses. *J Clin Invest*. 2014;124(6):2785-2801. [https://doi: 10.1172/jci64784](https://doi.org/10.1172/jci64784). PMID: 24892712.

24. Yan J, Thomson JK, Wu X, Zhao W, Pollard AE, Ai X. Novel methods of automated quantification of gap junction distribution and interstitial collagen quantity from animal and human atrial tissue sections. *PLoS One*. 2014;9(8):e104357. [https://doi: 10.1371/journal.pone.0104357](https://doi.org/10.1371/journal.pone.0104357). PMID: 25105669

25. Stromp TA, Spear TJ, Holtkamp RM, Andres KN, Kaine JC, Alghuraibawi WH, et al. Quantitative gadolinium-free cardiac fibrosis imaging in end stage renal disease patients reveals a longitudinal correlation with structural and functional decline. *Sci Rep*. 2018;8(1):16972. doi: 10.1038/s41598-018-35394-4. PMID: 30451960.

26. Okumura S, Takagi G, Kawabe J, Yang G, Lee MC, Hong C, et al. Disruption of type 5 adenylyl cyclase gene preserves cardiac function against pressure overload. *Proc Natl Acad Sci U S A*. 2003;100(17):9986-90. [https://doi: 10.1073/pnas.1733772100](https://doi.org/10.1073/pnas.1733772100). PMID: 12904575.

27. Jin H, Fujita T, Jin M, Kurotani R, Namekata I, Hamaguchi S, et al. Cardiac overexpression of *Epac1* in transgenic mice rescues lipopolysaccharide-induced cardiac

dysfunction and inhibits Jak-STAT pathway. *J Mol Cell Cardiol.* 2017;108:170-180.

[https://doi: 10.1016/j.yjmcc.2017.05.014](https://doi.org/10.1016/j.yjmcc.2017.05.014). PMID: 28629760.

28. Yu H, He Y, Zhang X, Peng Z, Yang Y, Zhu R, et al. The rat IgGFc $\gamma$ BP and Muc2 C-terminal domains and TFF3 in two intestinal mucus layers bind together by covalent interaction. *PLoS One.* 2011;6(5):e20334. [https://doi:](https://doi.org/10.1371/journal.pone.0020334)

[10.1371/journal.pone.0020334](https://doi.org/10.1371/journal.pone.0020334). PMID: 21629776.

29. Okumura S, Kawabe J, Yatani A, Takagi G, Lee MC, Hong C, et al. Type 5 adenylyl cyclase disruption alters not only sympathetic but also parasympathetic and calcium-mediated cardiac regulation. *Circ Res.* 2003;93(4):364-71. [https://doi:](https://doi.org/10.1161/01.res.0000086986.35568.63)

[10.1161/01.res.0000086986.35568.63](https://doi.org/10.1161/01.res.0000086986.35568.63). PMID: 12869393.

30. Yamamoto M, Yang G, Hong C, Liu J, Holle E, Yu X, et al. Inhibition of endogenous thioredoxin in the heart increases oxidative stress and cardiac hypertrophy.

*J Clin Invest.* 2003;112(9):1395-406. [https://doi: 10.1172/jci17700](https://doi.org/10.1172/jci17700). PMID: 14597765.

31. Miyata M, Suzuki S, Misaka T, Shishido T, Saitoh S, Ishigami A, et al.

Senescence marker protein 30 has a cardio-protective role in doxorubicin-induced cardiac dysfunction. *PLoS One.* 2013;8(12):e79093. [https://doi:](https://doi.org/10.1371/journal.pone.0079093)

[10.1371/journal.pone.0079093](https://doi.org/10.1371/journal.pone.0079093). PMID: 24391705.

32. Villalobos E, Criollo A, Schiattarella GG, Altamirano F, French KM, May HI, et al. Fibroblast primary cilia are required for cardiac fibrosis. *Circulation*. 2019;139(20):2342-57. [https://doi: 10.1161/circulationaha.117.028752](https://doi.org/10.1161/circulationaha.117.028752). PMID: 30818997.
33. Zhao H, Zhang M, Zhou F, Cao W, Bi L, Xie Y, et al. Cinnamaldehyde ameliorates LPS-induced cardiac dysfunction via TLR4-NOX4 pathway: The regulation of autophagy and ROS production. *J Mol Cell Cardiol*. 2016;101:11-24. [https://doi: 10.1016/j.yjmcc.2016.10.017](https://doi.org/10.1016/j.yjmcc.2016.10.017). PMID: 27838370.
34. Maejima Y, Kuroda J, Matsushima S, Ago T, Sadoshima J. Regulation of myocardial growth and death by NADPH oxidase. *J Mol Cell Cardiol*. 2011;50(3):408-16. [https://doi: 10.1016/j.yjmcc.2010.12.018](https://doi.org/10.1016/j.yjmcc.2010.12.018). PMID: 21215757.
35. Zhao W, Feng H, Sun W, Liu K, Lu JJ, Chen X. Tert-butyl hydroperoxide (t-BHP) induced apoptosis and necroptosis in endothelial cells: Roles of NOX4 and mitochondrion. *Redox Biol*. 2017;11:524-34. [https://doi: 10.1016/j.redox.2016.12.036](https://doi.org/10.1016/j.redox.2016.12.036). PMID: 28088644.

36. Zhang T, Zhang Y, Cui M. CaMKII is a RIP3 substrate mediating ischemia- and oxidative stress-induced myocardial necroptosis. *Nat Med*. 2016;22(2):175-82. [https://doi: 10.1038/nm.4017](https://doi.org/10.1038/nm.4017). PMID: 26726877.
37. Chen WJ, Chang SH, Chan YH, Lee JL, Lai YJ, Chang GJ, et al. Tachycardia-induced CD44/NOX4 signaling is involved in the development of atrial remodeling. *J Mol Cell Cardiol*. 2019;135:67-78. [https://doi: 10.1016/j.yjmcc.2019.08.006](https://doi.org/10.1016/j.yjmcc.2019.08.006). PMID: 31419440.
38. Zhao QD, Viswanadhapalli S, Williams P, Shi Q, Tan C, Yi X, et al. NADPH oxidase 4 induces cardiac fibrosis and hypertrophy through activating Akt/mTOR and NFκB signaling pathways. *Circulation*. 2015;131(7):643-655. [https://doi: 10.1161/circulationaha.114.011079](https://doi.org/10.1161/circulationaha.114.011079). PMID: 25589557.
39. Chen X, Xu S, Zhao C, Liu B. Role of TLR4/NADPH oxidase 4 pathway in promoting cell death through autophagy and ferroptosis during heart failure. *Biochem Biophys Res Commun*. 2019;516(1):37-43. [https://doi: 10.1016/j.bbrc.2019.06.015](https://doi.org/10.1016/j.bbrc.2019.06.015). PMID: 31196626.

40. Zhang Z, Singh R, Aschner M. Methods for the detection of autophagy in mammalian cells. *Current protocols in toxicology*. 2016;69:20.12.1-20.12.26. doi: 10.1002/cptx.11. PMID: 27479363.
41. Mizushima N, Yoshimori T, Levine B. Methods in mammalian autophagy research. *Cell*. 2010;140(3):313-26. [https://doi: 10.1016/j.cell.2010.01.028](https://doi.org/10.1016/j.cell.2010.01.028). PMID: 20144757.
42. Ishimura R, Tanaka K, Komatsu M. Dissection of the role of p62/Sqstm1 in activation of Nrf2 during xenophagy. *FEBS Lett*. 2014;588(5):822-8. [https://doi: 10.1016/j.febslet.2014.01.045](https://doi.org/10.1016/j.febslet.2014.01.045). PMID: 24492006.
43. Ichimura Y, Waguri S, Sou YS, Kageyama S, Hasegawa J, Ishimura R, et al. Phosphorylation of p62 activates the Keap1-Nrf2 pathway during selective autophagy. *Mol Cell*. 2013;51(5):618-31. [https://doi: 10.1016/j.molcel.2013.08.003](https://doi.org/10.1016/j.molcel.2013.08.003). PMID: 24011591.
44. Zhang C, Mo M, Ding W, Liu W, Yan D, Deng J, et al. High-mobility group box 1 (HMGB1) impaired cardiac excitation-contraction coupling by enhancing the sarcoplasmic reticulum (SR) Ca<sup>2+</sup> leak through TLR4-ROS signaling in cardiomyocytes.

J Mol Cell Cardiol. 2014;74:260-273. [https://doi: 10.1016/j.yjmcc.2014.06.003](https://doi.org/10.1016/j.yjmcc.2014.06.003). PMID: 24937603.

45. Mihaylova MM, Shaw RJ. The AMPK signalling pathway coordinates cell growth, autophagy and metabolism. *Nat Cell Biol.* 2011;13(9):1016-23. [https://doi: 10.1038/ncb2329](https://doi.org/10.1038/ncb2329). PMID: 21892142.

46. Watanabe S, Horie T, Nagao K, Kuwabara Y, Baba O, Nishi H, et al. Cardiac-specific inhibition of kinase activity in calcium/calmodulin-dependent protein kinase kinase- $\beta$  leads to accelerated left ventricular remodeling and heart failure after transverse aortic constriction in mice. *PLoS One.* 2014;9(9):e108201. [https://doi: 10.1371/journal.pone.0108201](https://doi.org/10.1371/journal.pone.0108201). PMID: 25255457.

47. Martin M, Katz J, Vogel SN, Michalek SM. Differential induction of endotoxin tolerance by lipopolysaccharides derived from *Porphyromonas gingivalis* and *Escherichia coli*. *J Immunol.* 2001;167(9):5278-85. [https:// doi: 10.4049/jimmunol.167.9.5278](https://doi.org/10.4049/jimmunol.167.9.5278). PMID: 11673543.

48. Hirschfeld M, Weis JJ, Toshchakov V, Salkowski CA, Cody MJ, Ward DC, et al. Signaling by toll-like receptor 2 and 4 agonists results in differential gene expression



in murine macrophages. *Infect Immun*. 2001;69(3):1477-1482. [https://doi:](https://doi.org/10.1128/iai.69.3.1477-1482.2001)

10.1128/iai.69.3.1477-1482.2001. PMID: 11179315.

49. Sokolova M, Vinge LE, Alfsnes K, Olsen MB, Eide L, Kaasbøll OJ, et al.

Palmitate promotes inflammatory responses and cellular senescence in cardiac

fibroblasts. *Biochim Biophys Acta. Mol Cell Biol Lipids*. 2017;1862(2):234-245.

[https://doi: 10.1016/j.bbalip.2016.11.003](https://doi.org/10.1016/j.bbalip.2016.11.003). PMID: 27845246.

50. Van Tassell BW, Raleigh JM, Abbate A. Targeting interleukin-1 in heart

failure and inflammatory heart disease. *Curr Heart Fail Rep*. 2015;12(1):33-41.

[https://doi: 10.1007/s11897-014-0231-7](https://doi.org/10.1007/s11897-014-0231-7). PMID: 25315037.

51. Piccoli MT, Gupta SK, Viereck J, Foinquinos A, Samolovac S, Kramer FL, et

al. Inhibition of the cardiac fibroblast-enriched lncRNA Meg3 prevents cardiac fibrosis

and diastolic dysfunction. *Circ Res*. 2017;121(5):575-583. [https://doi:](https://doi.org/10.1161/circresaha.117.310624)

10.1161/circresaha.117.310624. PMID: 28630135.

52. Zhang M, Perino A, Ghigo A, Hirsch E, Shah AM. NADPH oxidases in heart

failure: poachers or gamekeepers? *Antioxid Redox Signal*. 2013;18(9):1024-1041.

[https://doi: 10.1089/ars.2012.4550](https://doi.org/10.1089/ars.2012.4550). PMID: 22747566.

53. Parajuli N, Patel VB, Wang W, Basu R, Oudit GY. Loss of NOX2 (gp91phox) prevents oxidative stress and progression to advanced heart failure. *Clinical science* (London, England : 1979). 2014;127(5):331-40. Epub 2014/03/15. [https://doi: 10.1042/cs20130787](https://doi.org/10.1042/cs20130787). PMID: 24624929.
54. Matsushima S, Tsutsui H, Sadoshima J. Physiological and pathological functions of NADPH oxidases during myocardial ischemia-reperfusion. *Trends Cardiovasc Med*. 2014;24(5):202-5. [https://doi: 10.1016/j.tcm.2014.03.003](https://doi.org/10.1016/j.tcm.2014.03.003). PMID: 24880746;.
55. Zhang M, Brewer AC, Schröder K, Santos CX, Grieve DJ, Wang M, et al. NADPH oxidase-4 mediates protection against chronic load-induced stress in mouse hearts by enhancing angiogenesis. *Proc Natl Acad Sci U S A*. 2010;107(42):18121-18126. [https://doi: 10.1073/pnas.1009700107](https://doi.org/10.1073/pnas.1009700107). PMID: 20921387.
56. Sun QA, Hess DT, Nogueira L, Yong S, Bowles DE, Eu J, et al. Oxygen-coupled redox regulation of the skeletal muscle ryanodine receptor-Ca<sup>2+</sup> release channel by NADPH oxidase 4. *Proc Natl Acad Sci U S A*. 2011;108(38):16098-103. [https://doi: 10.1073/pnas.1109546108](https://doi.org/10.1073/pnas.1109546108). PMID: 21896730.

57. Ago T, Kuroda J, Pain J, Fu C, Li H, Sadoshima J. Upregulation of Nox4 by hypertrophic stimuli promotes apoptosis and mitochondrial dysfunction in cardiac myocytes. *Circ Res.* 2010;106(7):1253-64. [https://doi: 10.1161/circresaha.109.213116](https://doi.org/10.1161/circresaha.109.213116).

PMID: 20185797

58. Betz C, Hall MN. Where is mTOR and what is it doing there? *The Journal of cell biology.* 2013;203(4):563-74. [https://doi: 10.1083/jcb.201306041](https://doi.org/10.1083/jcb.201306041). PMID:

24385483.

## Figure legends

### Fig 1.

#### Experimental procedure and consumption of food and water during chronic

#### PG-LPS infusion in mice.

(A) Lipopolysaccharide derived from *Porphyromonas gingivalis* (PG-LPS) was administered once daily for 4 weeks via intraperitoneal injection (i.p.) at a dose of 0.8 mg/kg, dissolved in saline. Age-matched control mice (Control) received an identical volume of saline only.

(B) The Control, PG-LPS, TAK and LPS + TAK groups showed similar body weight at 4 weeks after the PG-LPS infusion. NS, not significantly different from the Control ( $P > 0.05$ ) by one-way ANOVA followed by the Tukey-Kramer *post hoc* test.

(C-D) Consumed amounts of food (C) and water (D) were similar among the four groups.  $P = NS$  vs. Control). NS, not significantly different from the Control ( $P > 0.05$ ) by one-way ANOVA followed by the Tukey-Kramer *post hoc* test. Data shows means  $\pm$  SD and scattered dots show individual data.

### Fig 2.

### **Effects of chronic PG-LPS infusion on fibrosis in cardiac muscle.**

(A) Representative images of Masson-trichrome-stained sections of cardiac muscle in the Control (*upper left*), PG-LPS (LPS) (*upper right*), TAK-242 (TAK) (*lower left*) and PG-LPS + TAK-242 (LPS + TAK) (*lower right*) groups. Scale bars: 50  $\mu$ m.

(B) The area of fibrosis was significantly increased in the PG-LPS group ( $P < 0.01$  vs. Control), and this increase was significantly attenuated by TAK-242.  $**P < 0.01$  vs. Control or  $\#P < 0.01$  vs. PG-LPS group by one-way ANOVA followed by the Tukey-Kramer *post hoc* test.

(C) Expression of phospho-ERK1/2 (Thr-202/Tyr-204) (C) and  $\alpha$ -SMA (D) was significantly increased in cardiac muscle of PG-LPS-treated mice, and these increases were significantly attenuated by TAK-242.  $*P < 0.05$  vs. Control,  $\#P < 0.05$  vs. PG-LPS group or  $\#P < 0.01$  vs. PG-LPS group by one-way ANOVA followed by the Tukey-Kramer *post hoc* test. Full-size images of immunoblots are presented in **S3 and S4 Figs of S1 Data**. Data shows means  $\pm$  SD and scattered dots show individual data.

### **Fig 3.**

### **Effects of chronic PG-LPS infusion on cardiac myocyte apoptosis.**

(A) Representative images of TUNEL-stained sections of cardiac muscle in the Control (*upper left*), PG-LPS (LPS) (*upper right*), TAK-242 (TAK) (*lower left*) and PG-LPS + TAK-242 (LPS + TAK) (*lower right*) groups. Scale bars: 2  $\mu\text{m}$ . Black arrows: TUNEL-positive myocytes.

(B) The number of TUNEL-positive myocyte was significantly increased in the PG-LPS group ( $P < 0.01$  vs. Control), and this increase was significantly attenuated by TAK-242.

\*\* $P < 0.01$  vs. Control or ## $P < 0.01$  vs. PG-LPS group by one-way ANOVA followed by the Tukey-Kramer *post hoc* test.

(C) Expression of anti-apoptotic BCL-2 protein was significantly decreased in cardiac muscle of PG-LPS-treated mice, and this change was significantly attenuated by TAK-242. \* $P < 0.05$  vs. Control or ## $P < 0.01$  vs. PG-LPS group by one-way ANOVA followed by the Tukey-Kramer *post hoc* test. Full-size images of immunoblots are presented in **S5 Fig of S1 Data**. Data shows means  $\pm$  SD and scattered dots show individual data.

#### **Fig 4.**

#### **Effects of chronic PG-LPS infusion on oxidative stress.**

(A) Representative images of 8-OHdG-immunostained sections of cardiac muscle in the Control (*upper left*), PG-LPS (LPS) (*upper right*), TAK-242 (TAK) (*lower left*) and PG-LPS + TAK-242 (LPS + TAK) (*lower right*) groups. Scale bars: 2  $\mu\text{m}$ . Black arrows: TUNEL-positive myocytes.

(B) The number of 8-OHdG-positive myocytes was significantly increased in the PG-LPS group, and this increase was significantly attenuated by TAK-242.  $**P < 0.01$  vs. Control or  $\#P < 0.01$  vs. PG-LPS group by one-way ANOVA followed by the Tukey-Kramer *post hoc* test.

(C) TLR4 expression was similar among the four groups. NS, not significantly different from the Control ( $P > 0.05$ ) by one-way ANOVA followed by the Tukey-Kramer *post hoc* test. Full-size images of immunoblots are presented in **S6 Fig of S1 Data**.

(D) NOX4 expression was significantly increased in the PG-LPS group, and this increase was significantly attenuated by TAK-242.  $*P < 0.05$  vs. Control or  $\#P < 0.01$  vs. PG-LPS group by one-way ANOVA followed by the Tukey-Kramer *post hoc* test.

Full-size images of immunoblots are presented in **S7 Fig of S1 Data**.

(E) NOX2 expression was similar among the four groups. NS, not significantly different from the Control ( $P > 0.05$ ) by one-way ANOVA followed by the

Tukey-Kramer *post hoc* test. Full-size images of immunoblots are presented in **S8 Fig of S1 Data**. Data shows means  $\pm$  SD and scattered dots show individual data.

### **Fig 5.**

#### **Effects of chronic PG-LPS infusion on RIP3, CaMKII, PLN, RyR2 in the heart.**

**(A)** RIP3 phosphorylation (Thr-231/Ser-232) was significantly increased in the PG-LPS group, and this increase was significantly attenuated by TAK-242. \* $P < 0.05$  vs. Control or # $P < 0.01$  vs. PG-LPS group by one-way ANOVA followed by the Tukey-Kramer *post hoc* test. Full-size images of immunoblots are presented in **S9 Fig of S1 Data**.

**(B)** CaMKII phosphorylation (Thr-286) was significantly increased in the PG-LPS group, and this increase was significantly attenuated by TAK-242. \* $P < 0.05$  vs. Control or # $P < 0.01$  vs. PG-LPS group by one-way ANOVA followed by the Tukey-Kramer *post hoc* test. Full-size images of immunoblots are presented in **S10 Fig of S1 Data**.

**(C)** CaMKII oxidation was significantly increased in the PG-LPS group, and this increase was significantly attenuated by TAK-242. \*\* $P < 0.01$  vs. Control or # $P < 0.05$  vs. PG-LPS group by one-way ANOVA followed by the Tukey-Kramer *post hoc* test.

Full-size images of immunoblots are presented in **S11 Fig of S1 Data**.



**(D)** PLN phosphorylation (Thr-17) was significantly increased in the PG-LPS group, and this increase was significantly attenuated by TAK-242.  $**P < 0.05$  vs. Control or  $\#P < 0.05$  vs. PG-LPS group by one-way ANOVA followed by the Tukey-Kramer *post hoc* test. Full-size images of immunoblots are presented in **S12 Fig of S1 Data**.

**(E)** RyR2 phosphorylation (Ser-2814) was significantly increased in the PG-LPS group, and this increase was significantly attenuated by TAK-242.  $**P < 0.01$  vs. Control or  $\#P < 0.05$  vs. PG-LPS group by one-way ANOVA followed by the Tukey-Kramer *post hoc* test. Full-size images of immunoblots are presented in **S13 Fig of S1 Data**. Data show means  $\pm$  SD and representative immunoblotting are shown.

## **Fig 6.**

### **Effects of chronic PG-LPS infusion on Akt, mTOR, p70S6K, LC3, p62 in the heart.**

**(A)** Akt phosphorylation (Ser-473) was significantly increased in the PG-LPS group, and this increase was significantly attenuated by TAK-242.  $**P < 0.01$  vs. Control or  $\#\#P < 0.01$  vs. PG-LPS group by one-way ANOVA followed by the Tukey-Kramer *post hoc* test. Full-size images of immunoblots are presented in **S14 Fig of S1 Data**.

**(B)** mTOR phosphorylation (Ser-2448) was significantly increased in the PG-LPS group, and this increase was significantly attenuated by TAK-242. \* $P < 0.05$  vs. Control or  $^{\#}P < 0.05$  vs. PG-LPS group by one-way ANOVA followed by the Tukey-Kramer *post hoc* test. Full-size images of immunoblots are presented in **S15 Fig of S1 Data**.

**(C)** p70S6K phosphorylation (Ser-389) was significantly increased in the PG-LPS group, and this increase was significantly attenuated by TAK-242. \*\* $P < 0.01$  vs. Control or  $^{\#}P < 0.01$  vs. PG-LPS group by one-way ANOVA followed by the Tukey-Kramer *post hoc* test. Full-size images of immunoblots are presented in **S16 Fig of S1 Data**. Data shows means  $\pm$  SD and scattered dots show individual data.

**Fig 7.**

**(A)** Representative immunoblotting of LC3-I, LC3-II, phospho-p62 (Ser-351), p62, AMPK and GAPDH are shown. Full-size images of immunoblots are presented in **S17-S21 Figs of S1 Data**.

**(B)** LC3-II/LC3-I was significantly increased in the PG-LPS group, and this increase was significantly attenuated by TAK-242. \*\* $P < 0.01$  vs. Control or # $P < 0.05$  vs.

PG-LPS group by one-way ANOVA followed by the Tukey-Kramer *post hoc* test.

**(C)** LC3-II expression was significantly increased in the PG-LPS group, and this increase was significantly attenuated by TAK-242. \*\* $P < 0.01$  vs. Control or # $P < 0.05$  vs. PG-LPS group by one-way ANOVA followed by the Tukey-Kramer *post hoc* test.

**(D)** p62 phosphorylation (Ser-351) was significantly increased in the PG-LPS group, and this increase was significantly attenuated by TAK-242. \*\* $P < 0.01$  vs. Control or # $P < 0.05$  vs. PG-LPS group by one-way ANOVA followed by the Tukey-Kramer *post hoc* test.

**(E)** p62 expression was similar among the four groups. NS, not significantly different from the Control ( $P > 0.05$ ) by one-way ANOVA followed by the Tukey-Kramer *post hoc* test.

**(F)** AMPK (Thr-172) was significantly increased in the PG-LPS group, and this increase was significantly attenuated by TAK-242. \* $P < 0.05$  vs. Control or ## $P < 0.01$  vs. PG-LPS group by one-way ANOVA followed by the Tukey-Kramer *post hoc* test.

Data are means  $\pm$  SD and representative immunoblots are shown. Data shows means  $\pm$

SD and scattered dots show individual data.

**Table 1 Serum levels of pro-inflammatory cytokines, PDGF-BB and VEGF**

| pg/ml         | Control        | LPS            | TAK             | LPS+TAK        |
|---------------|----------------|----------------|-----------------|----------------|
| n             | 7              | 7              | 7               | 7              |
| TNF- $\alpha$ | 5371 $\pm$ 546 | 4318 $\pm$ 453 | 5341 $\pm$ 1055 | 3087 $\pm$ 605 |
| IL-1 $\beta$  | 177 $\pm$ 17   | 172 $\pm$ 12   | 203 $\pm$ 28    | 179 $\pm$ 30   |
| IL-6          | 105 $\pm$ 9    | 88 $\pm$ 9     | 106 $\pm$ 8     | 83 $\pm$ 13    |
| IL-10         | 679 $\pm$ 50   | 582 $\pm$ 18   | 767 $\pm$ 33    | 586 $\pm$ 68   |
| IL-17         | 973 $\pm$ 218  | 1001 $\pm$ 82  | 747 $\pm$ 117   | 645 $\pm$ 155  |
| IFN- $\gamma$ | 609 $\pm$ 50   | 574 $\pm$ 39   | 970 $\pm$ 317   | 513 $\pm$ 66   |
| MCP-1         | 1661 $\pm$ 131 | 1681 $\pm$ 85  | 1681 $\pm$ 141  | 1640 $\pm$ 175 |
| VEGF-A        | 345 $\pm$ 15   | 342 $\pm$ 14   | 379 $\pm$ 23    | 340 $\pm$ 39   |
| PDGF-BB       | 35 $\pm$ 9     | 38 $\pm$ 12    | 30 $\pm$ 8      | 41 $\pm$ 14    |

**Table 2 Cardiac function assessed by echocardiography**

**A. One week after PG-LPS**

|        | Control       | LPS                      | TAK           | LPS+TAK       |
|--------|---------------|--------------------------|---------------|---------------|
| n      | 7             | 7                        | 7             | 7             |
| IVSTd  | 0.55 ± 0.02   | 0.55 ± 0.02              | 0.52 ± 0.01   | 0.56 ± 0.017  |
| LVSTs  | 0.96 ± 0.03   | 0.89 ± 0.02              | 0.89 ± 0.03   | 0.90 ± 0.03   |
| LVEDV  | 0.20 ± 0.01   | 0.21 ± 0.01              | 0.21 ± 0.009  | 0.23 ± 0.01   |
| CO     | 50 ± 5.2      | 45 ± 4.5                 | 46 ± 3.1      | 46 ± 3.0      |
| HR     | 368 ± 27.6    | 366 ± 19.6               | 355 ± 17.3    | 337 ± 13.0    |
| LVIDd  | 4.3 ± 0.09    | 4.4 ± 0.09               | 4.4 ± 0.07    | 4.5 ± 0.08    |
| LVIDs  | 2.9 ± 0.07    | 3.3 ± 0.06 <sup>**</sup> | 3.1 ± 0.05    | 3.3 ± 0.08    |
| ESV    | 0.066 ± 0.005 | 0.090 ± 0.005            | 0.078 ± 0.003 | 0.091 ± 0.006 |
| EF     | 67 ± 0.5      | 58 ± 1.2 <sup>**</sup>   | 62 ± 0.7      | 60 ± 0.8      |
| LVPWTd | 0.53 ± 0.02   | 0.53 ± 0.002             | 0.53 ± 0.019  | 0.54 ± 0.011  |
| LVPWTs | 0.83 ± 0.02   | 0.78 ± 0.015             | 0.83 ± 0.02   | 0.82 ± 0.02   |
| SV     | 0.13 ± 0.008  | 0.12 ± 0.009             | 0.13 ± 0.006  | 0.14 ± 0.006  |
| FS     | 32 ± 0.3      | 26 ± 0.7 <sup>**</sup>   | 29 ± 0.5      | 27 ± 0.5      |

**B. Four weeks after PG-LPS**

|        | Control       | LPS                    | TAK           | LPS+TAK               |
|--------|---------------|------------------------|---------------|-----------------------|
| n      | 7             | 7                      | 7             | 7                     |
| IVSTd  | 0.50 ± 0.02   | 0.49 ± 0.02            | 0.51 ± 0.02   | 0.51 ± 0.017          |
| LVSTs  | 0.91 ± 0.02   | 0.81 ± 0.03            | 0.84 ± 0.04   | 0.85 ± 0.02           |
| LVEDV  | 6.6 ± 6.39    | 0.23 ± 0.02            | 0.24 ± 0.017  | 0.24 ± 0.02           |
| CO     | 59 ± 4.3      | 53 ± 4.3               | 54 ± 5.0      | 57 ± 3.8              |
| HR     | 409 ± 15.0    | 412 ± 22.7             | 377 ± 24.4    | 396 ± 18.4            |
| LVIDd  | 4.4 ± 0.06    | 4.5 ± 0.11             | 4.6 ± 0.11    | 4.6 ± 0.11            |
| LVIDs  | 3.0 ± 0.05    | 3.3 ± 0.09             | 3.3 ± 0.12    | 3.3 ± 0.07            |
| ESV    | 0.073 ± 0.003 | 0.097 ± 0.007          | 0.096 ± 0.010 | 0.092 ± 0.006         |
| EF     | 66 ± 0.5      | 57 ± 1.0 <sup>**</sup> | 60 ± 1.3      | 61 ± 0.6 <sup>#</sup> |
| LVPWTd | 0.49 ± 0.03   | 0.48 ± 0.01            | 0.50 ± 0.013  | 0.53 ± 0.018          |
| LVPWTs | 0.86 ± 0.03   | 0.80 ± 0.03            | 0.84 ± 0.02   | 0.86 ± 0.03           |
| SV     | 0.14 ± 0.005  | 0.13 ± 0.010           | 0.14 ± 0.008  | 0.14 ± 0.01           |
| FS     | 32 ± 0.3      | 26 ± 0.7 <sup>**</sup> | 27 ± 0.8      | 28 ± 0.4 <sup>#</sup> |

IVSTd (mm): interventricular septum thickness at end-diastole

LVSTs (mm): interventricular septum thickness at end-systole

LVEDV (mL): left ventricular end-diastolic volume

CO (mL/min): cardiac output

LVIDd (mm): left ventricular internal dimension at end-diastole

LVIDs (mm): left ventricular internal dimension at end-systole

ESV (mL): left ventricular end-systolic volume

EF (%): ejection fraction

LVPWTd (mm): left ventricular posterior wall thickness at end-diastole

LVPWTs (mm): left ventricular posterior wall thickness at end-systole

SV (mL): stroke volume

%FS (%): % fractional shortening

\*\* $P < 0.01$  vs. Control,

# $P < 0.05$  vs. LPS

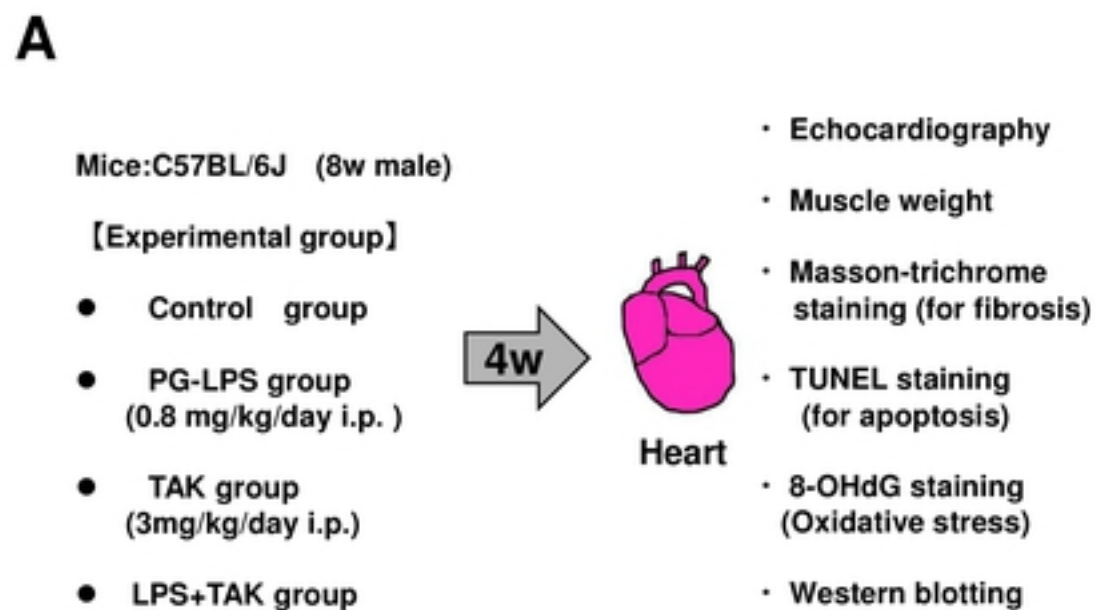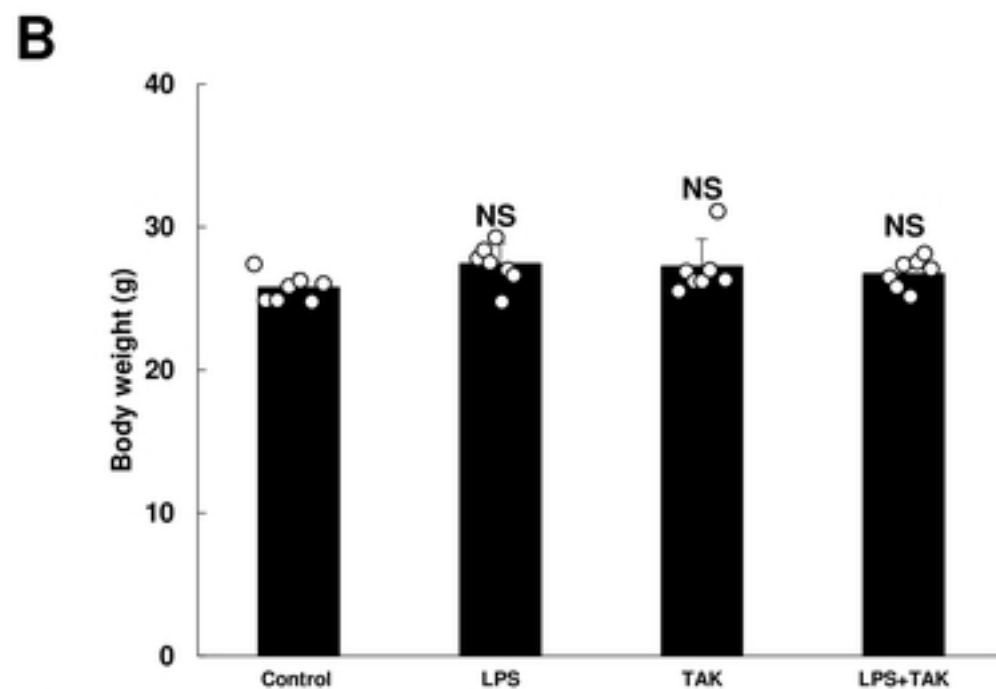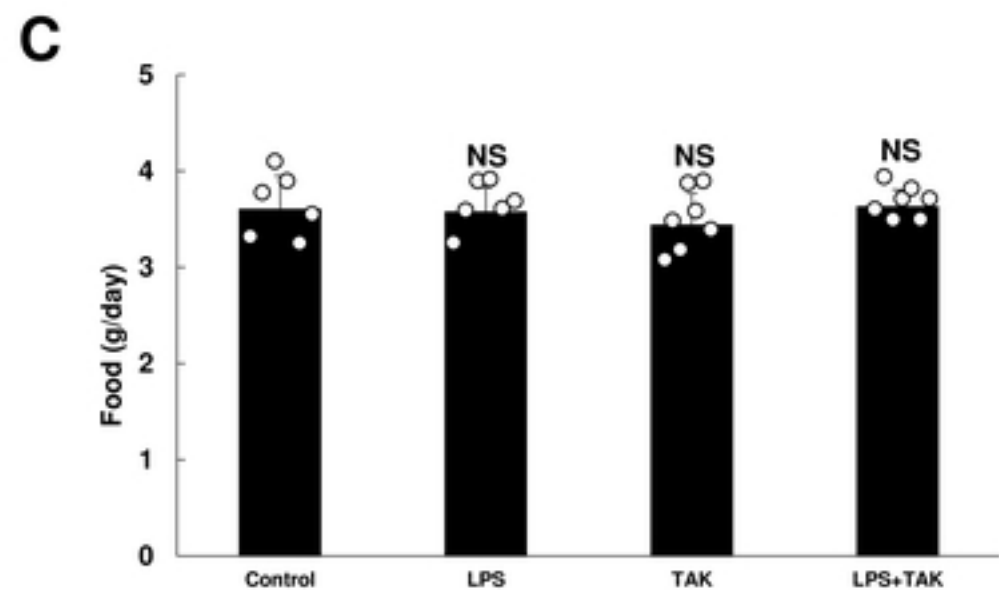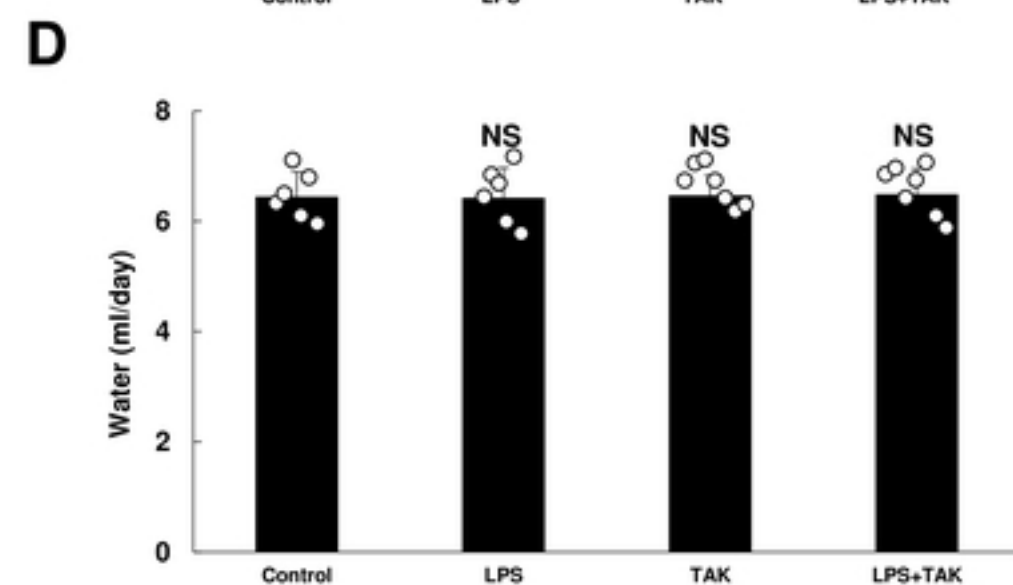

Figure 1



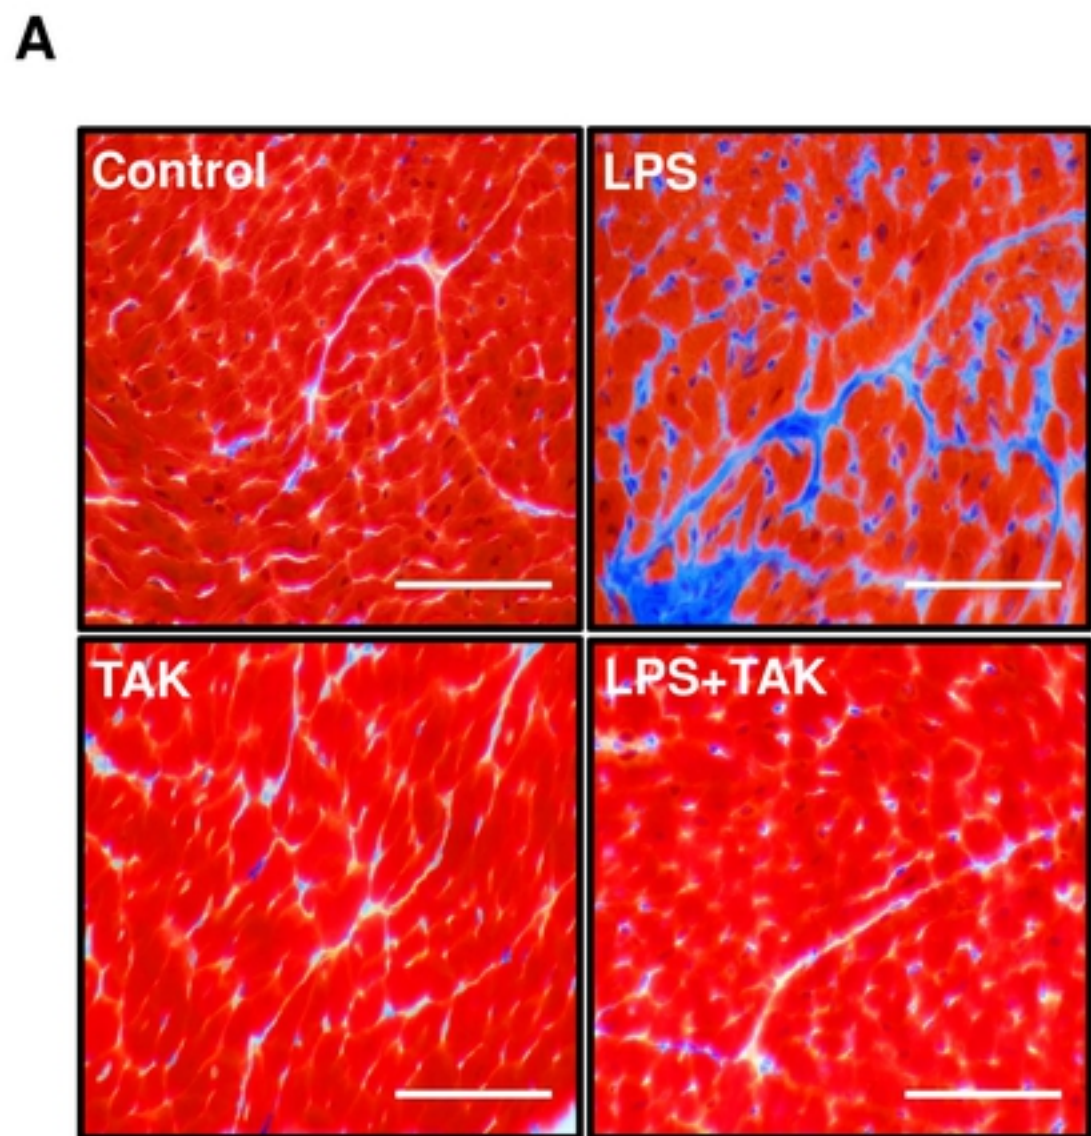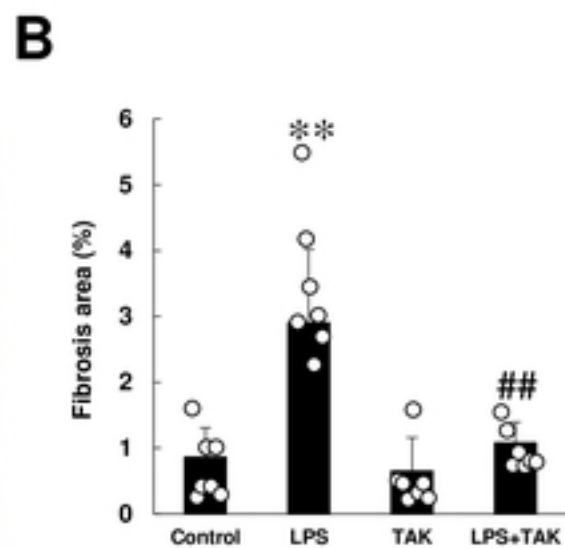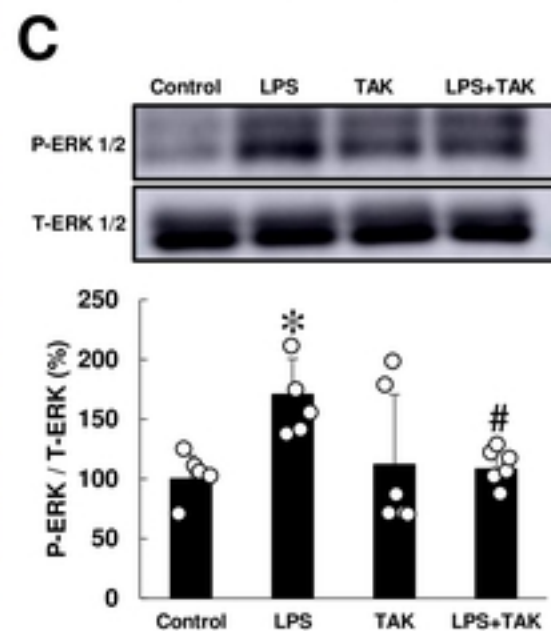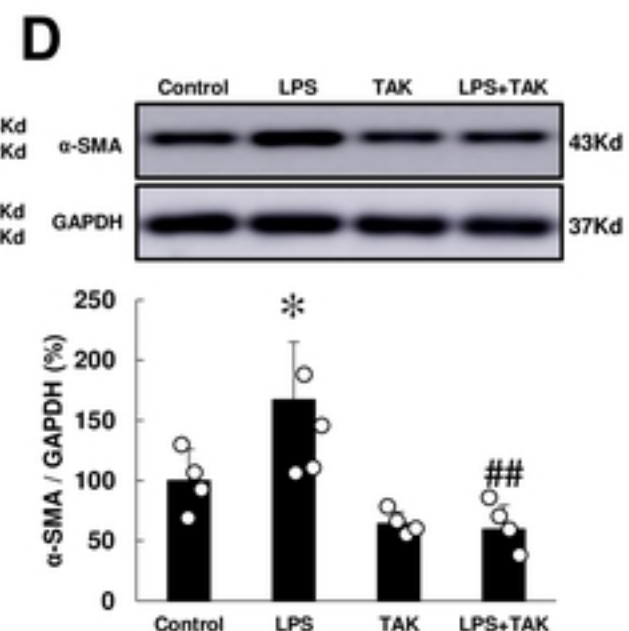

Figure 2

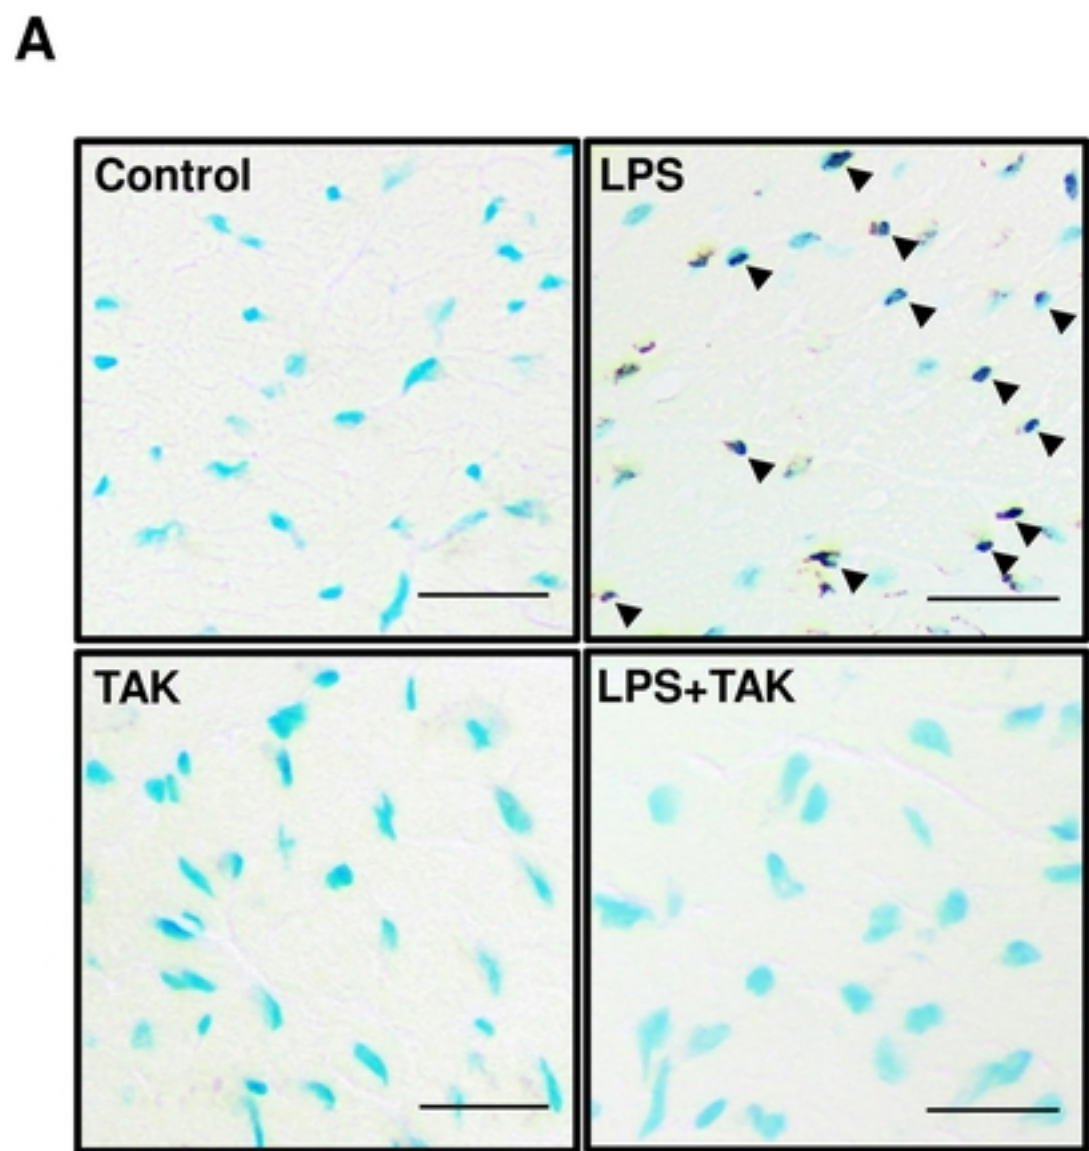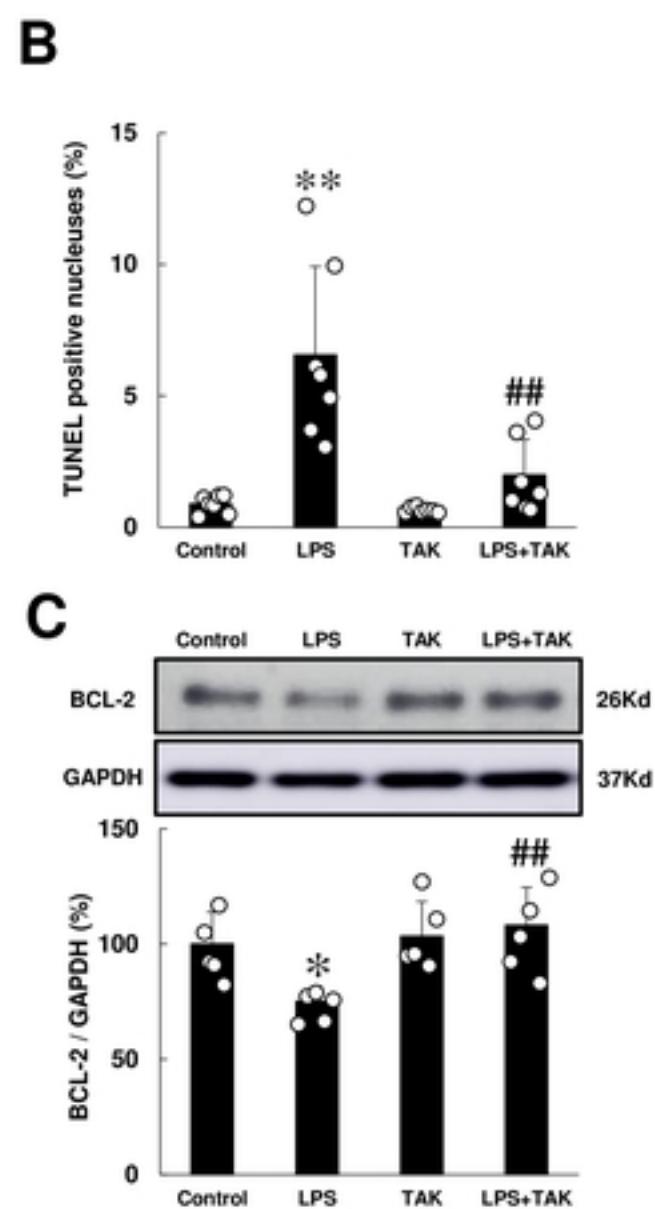

Figure 3



**A**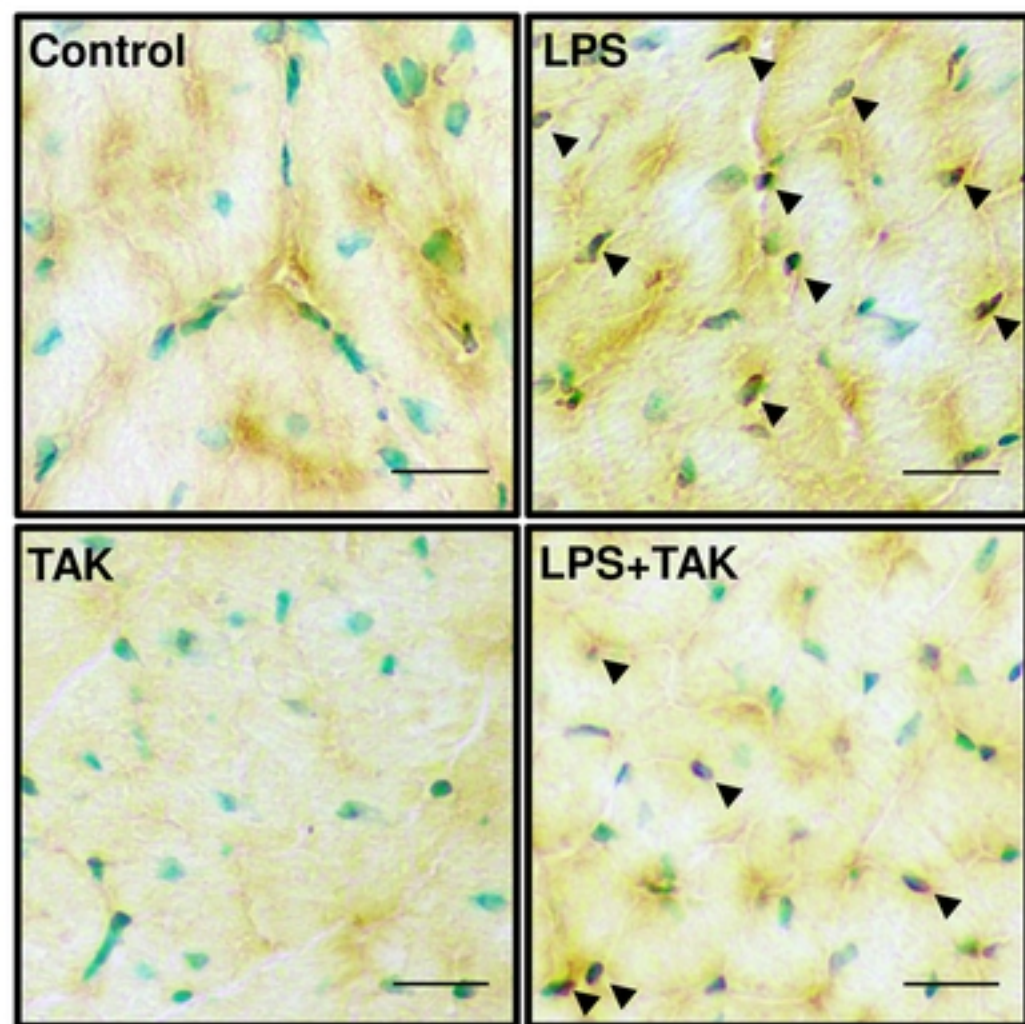**B**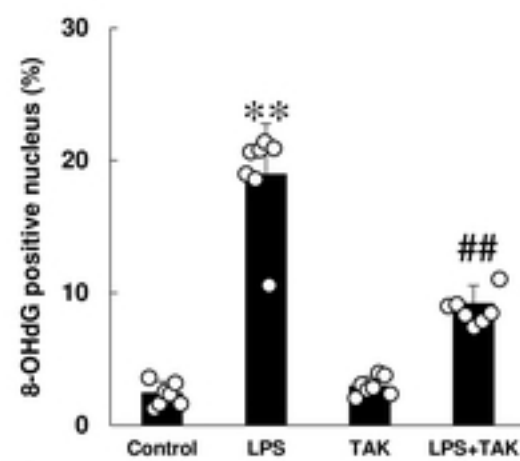**D**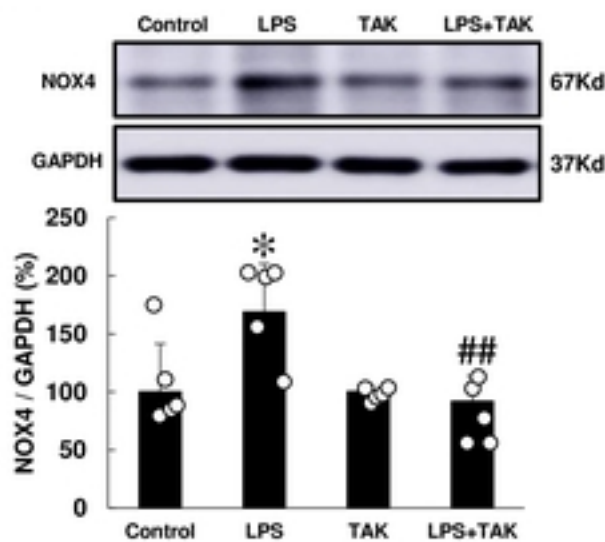**C**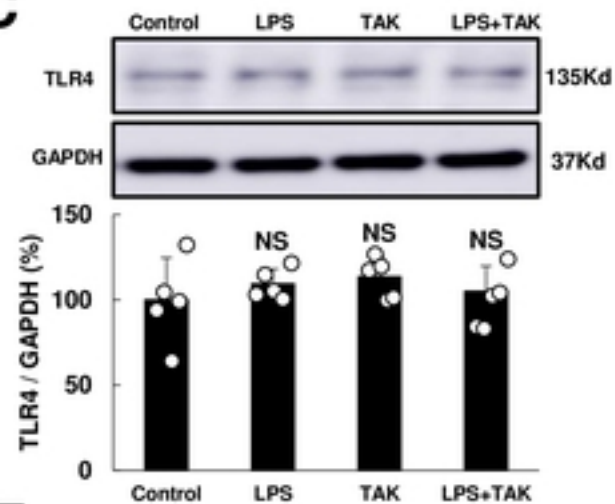**E**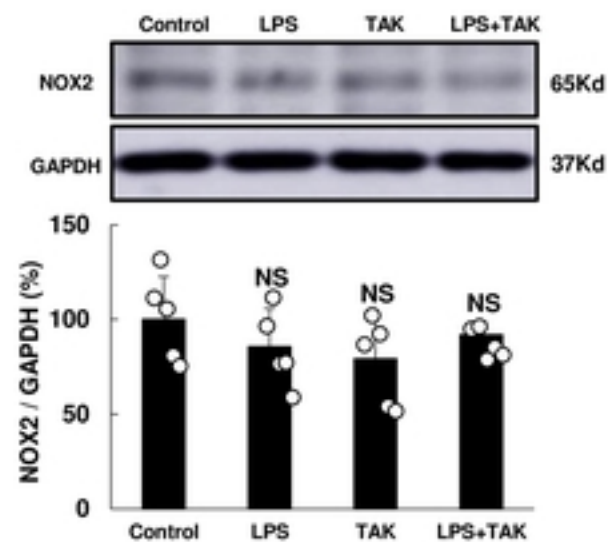

Figure 4

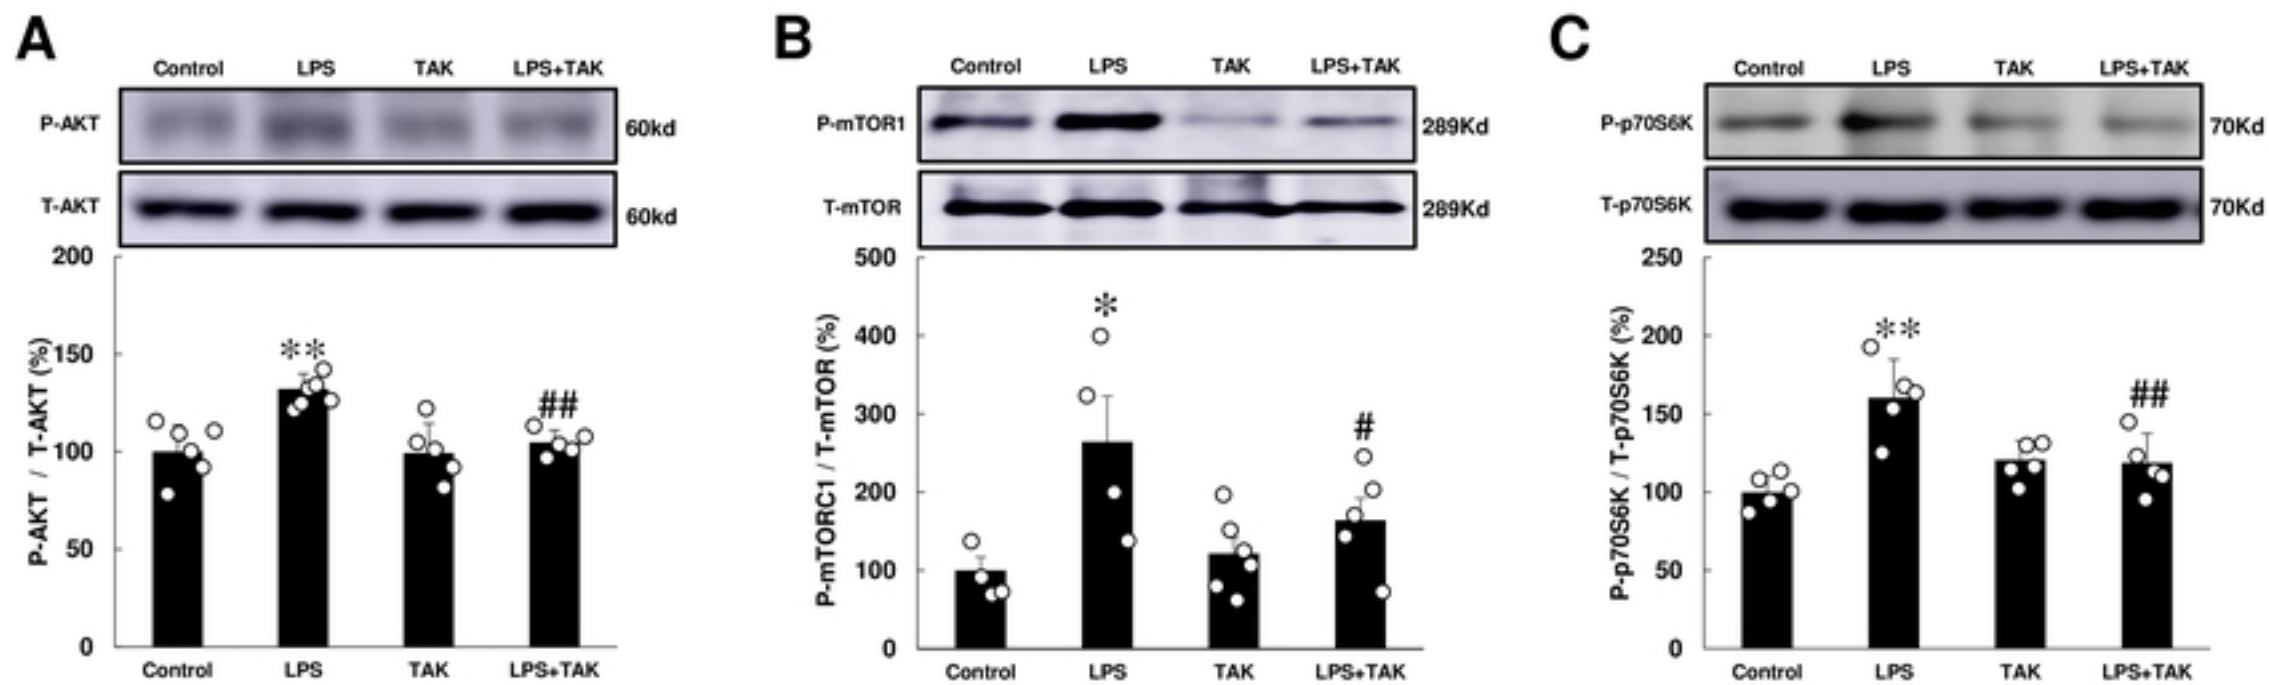

Figure 6

**A**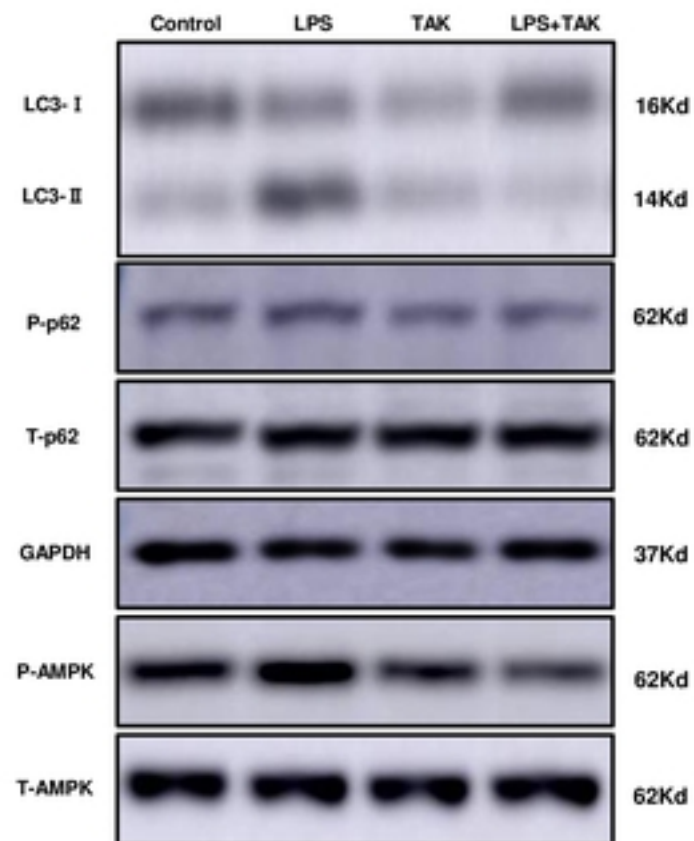**B**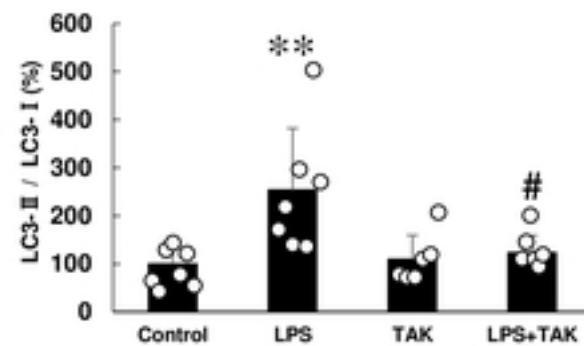**C**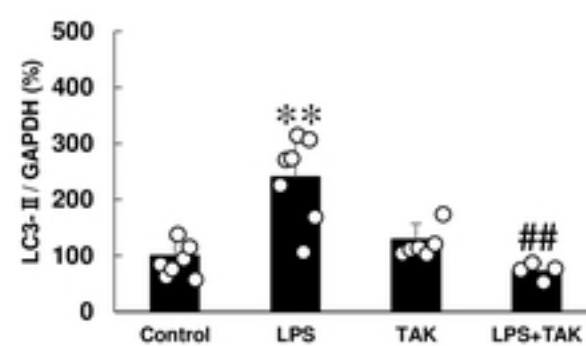**D**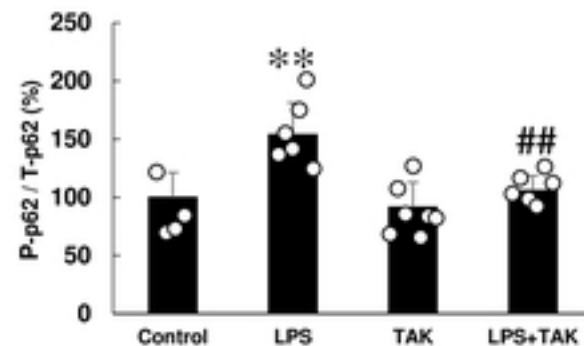**E**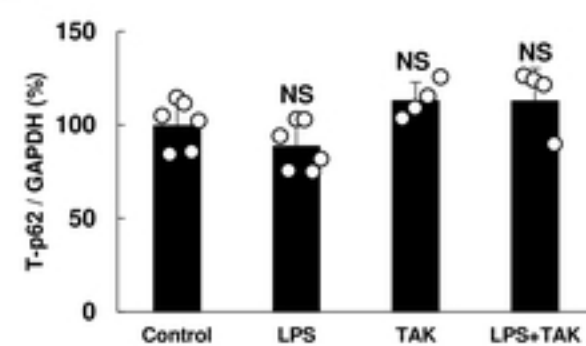**F**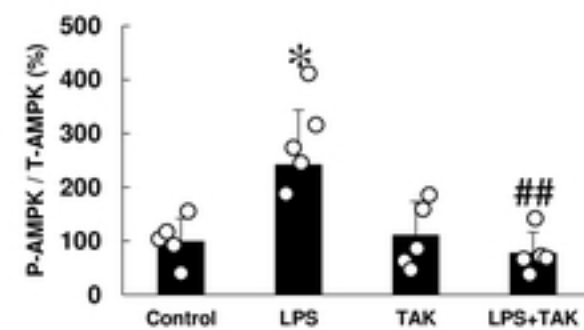

Figure 7

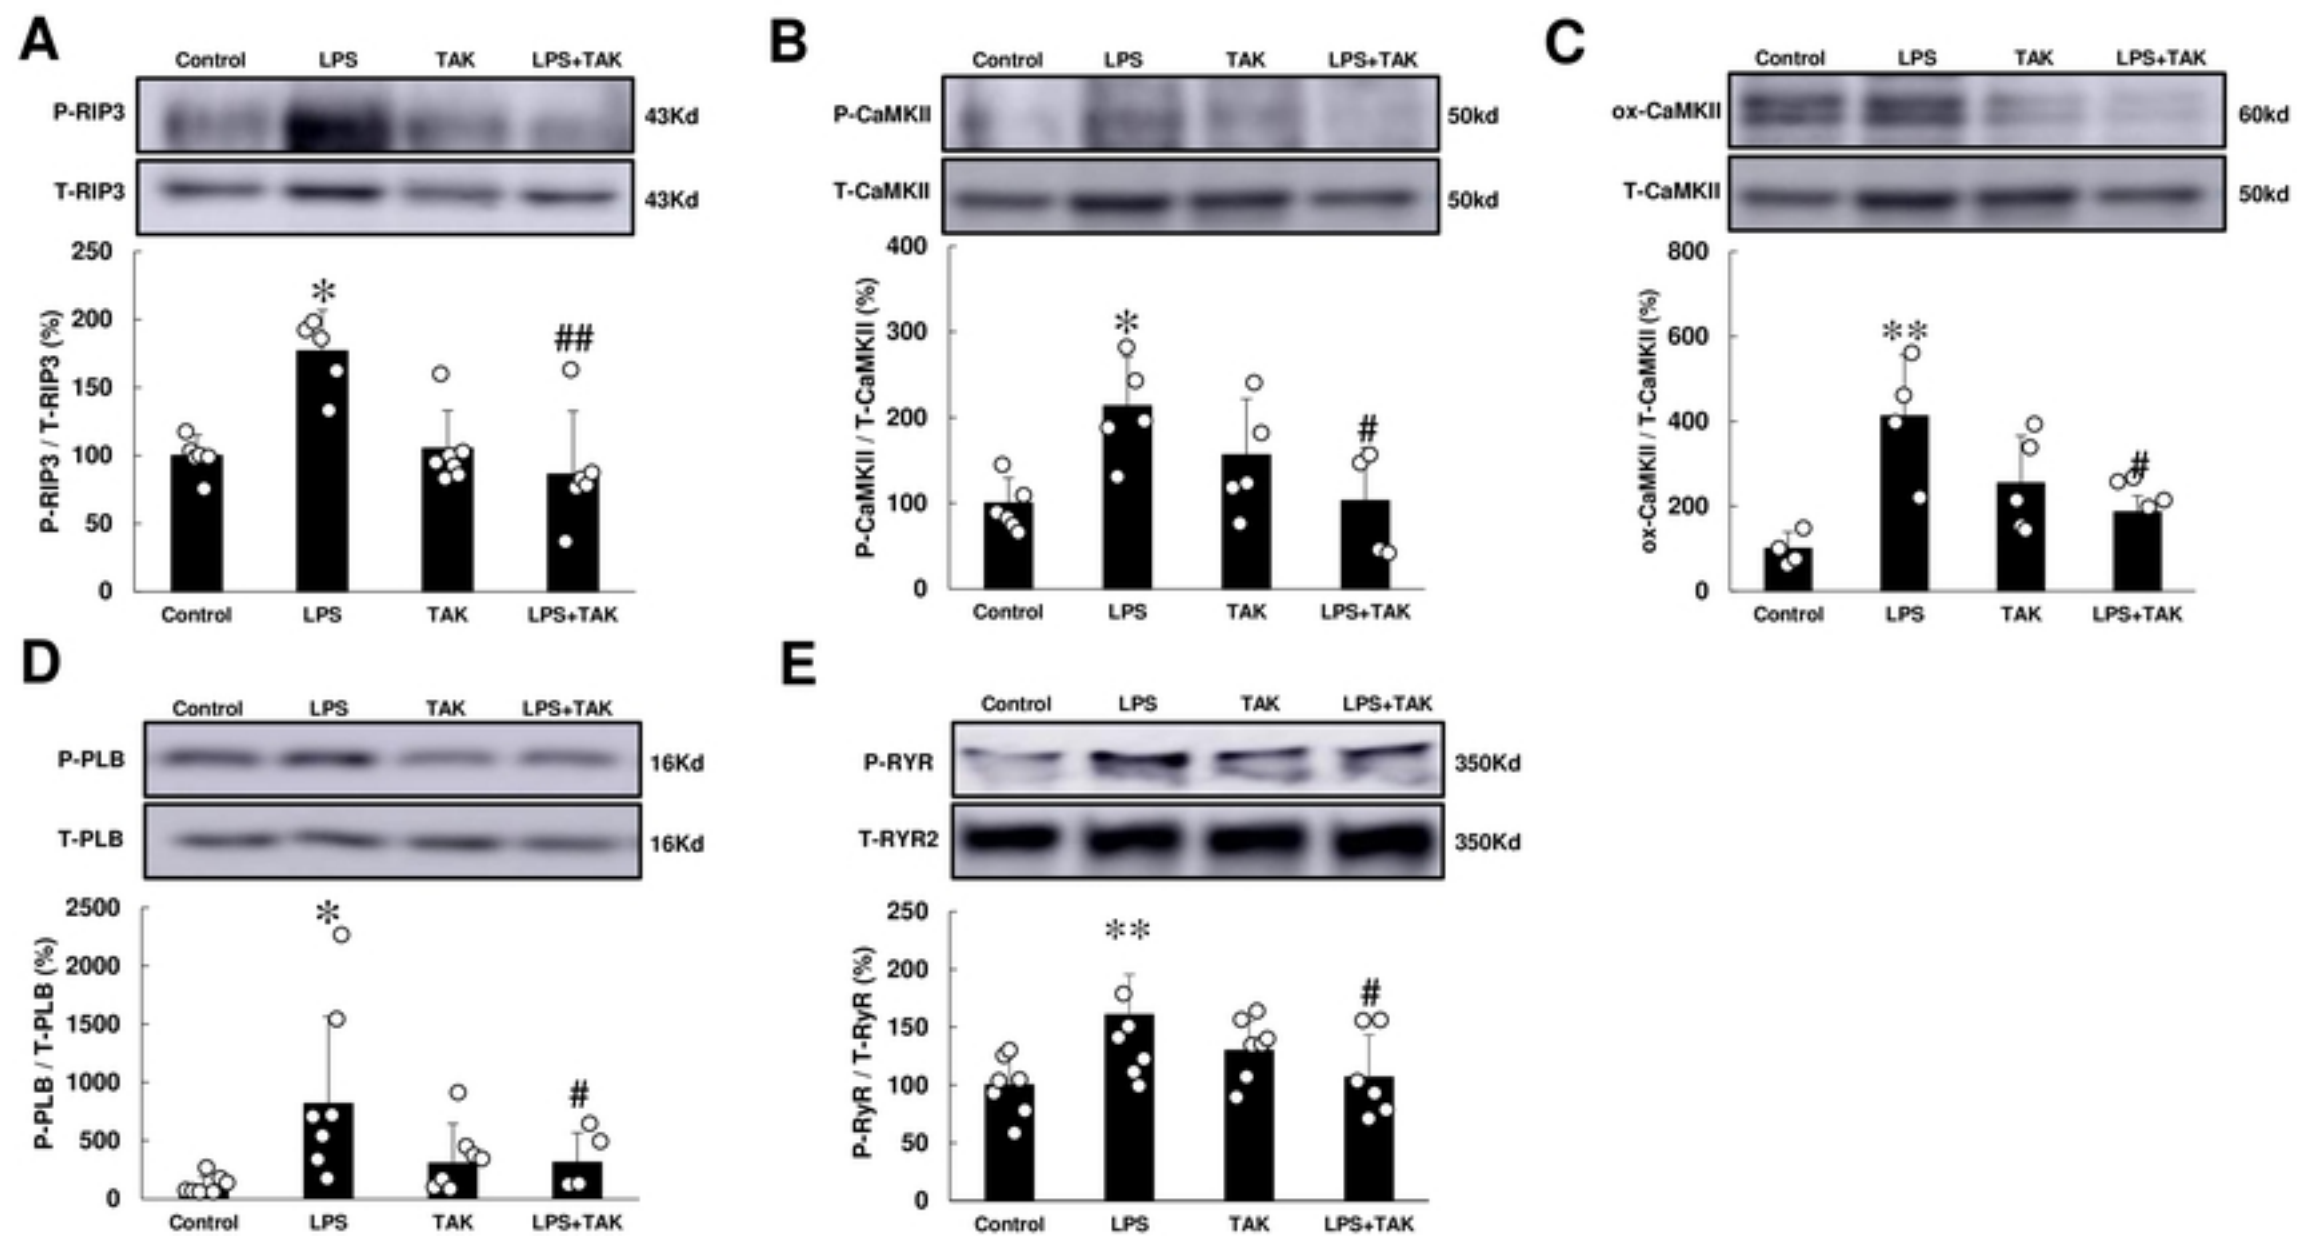

Figure 5
